# Supplementary material for: A new approach to the 8b-azaacenaphthylene ring system
Source: Royal Society of Chemistry journal article supplement (doi:10.1039/c5ob01013f), 2015-01-01

## **New Approach to the 8b-Azaacenaphthylene Ring System**

Anushree Kamath, Charles-Henry Fabritius, Christian Philouze<sup>†</sup> and Philippe Delair\*

SERCO and <sup>†</sup>MUST, Département de Chimie Moléculaire, Univ. Grenoble Alpes, ICMG FR-2607, CNRS, UMR-5616, F-38041 Grenoble, France

## **Supporting Information**

### **Table of Contents**

<sup>1</sup>H and <sup>13</sup>C NMR spectra for compounds **8-20**.....page S-2

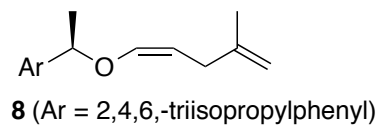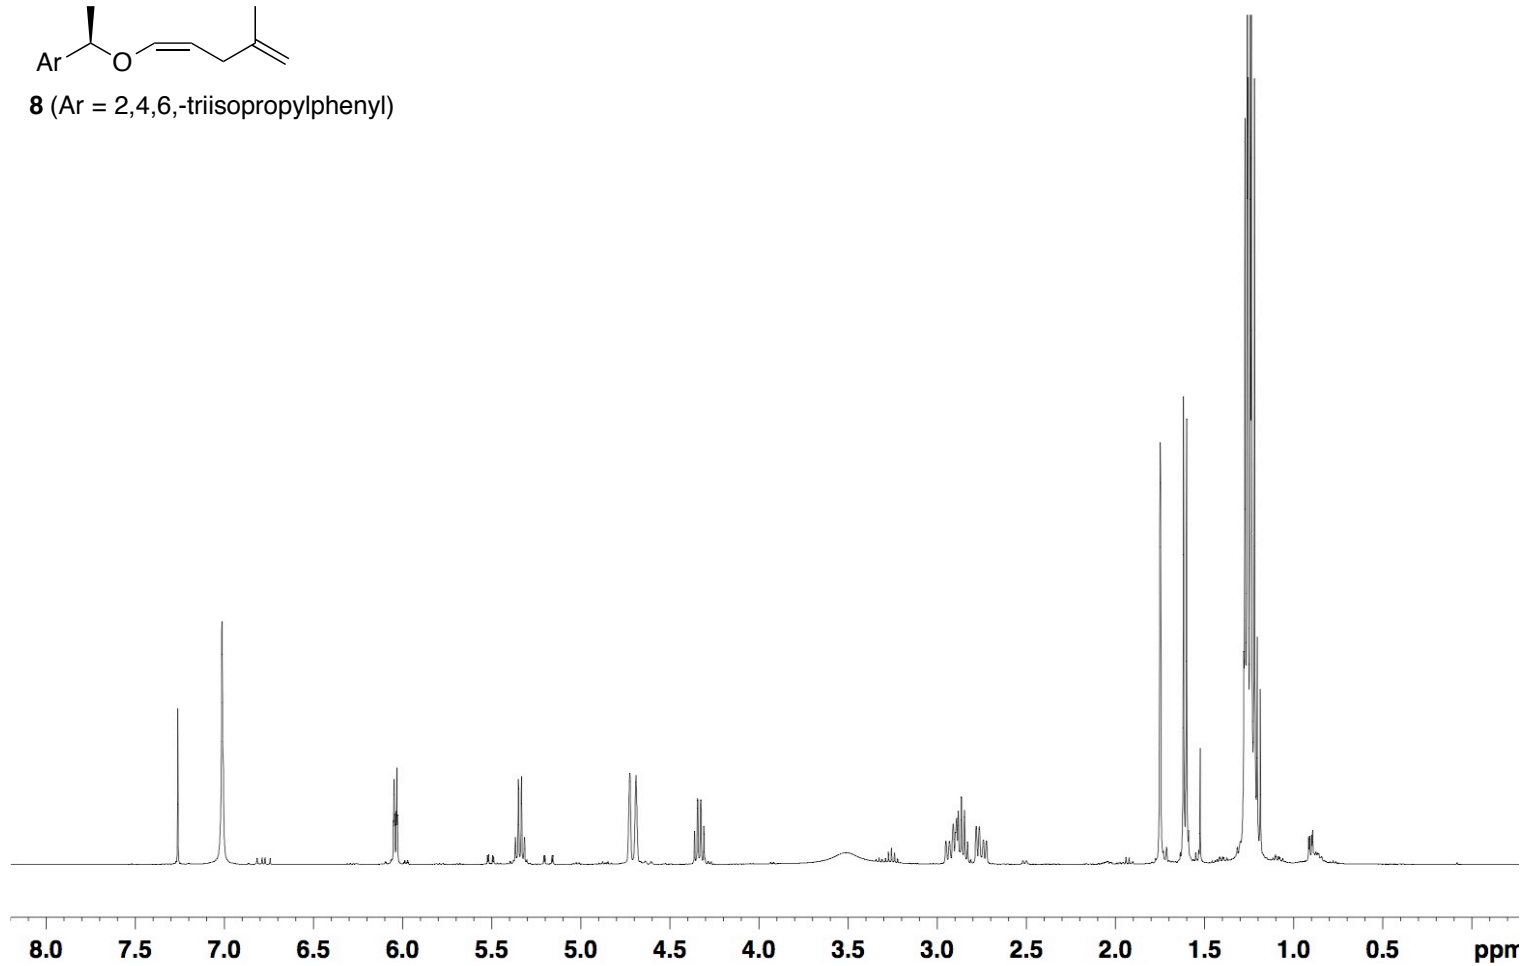

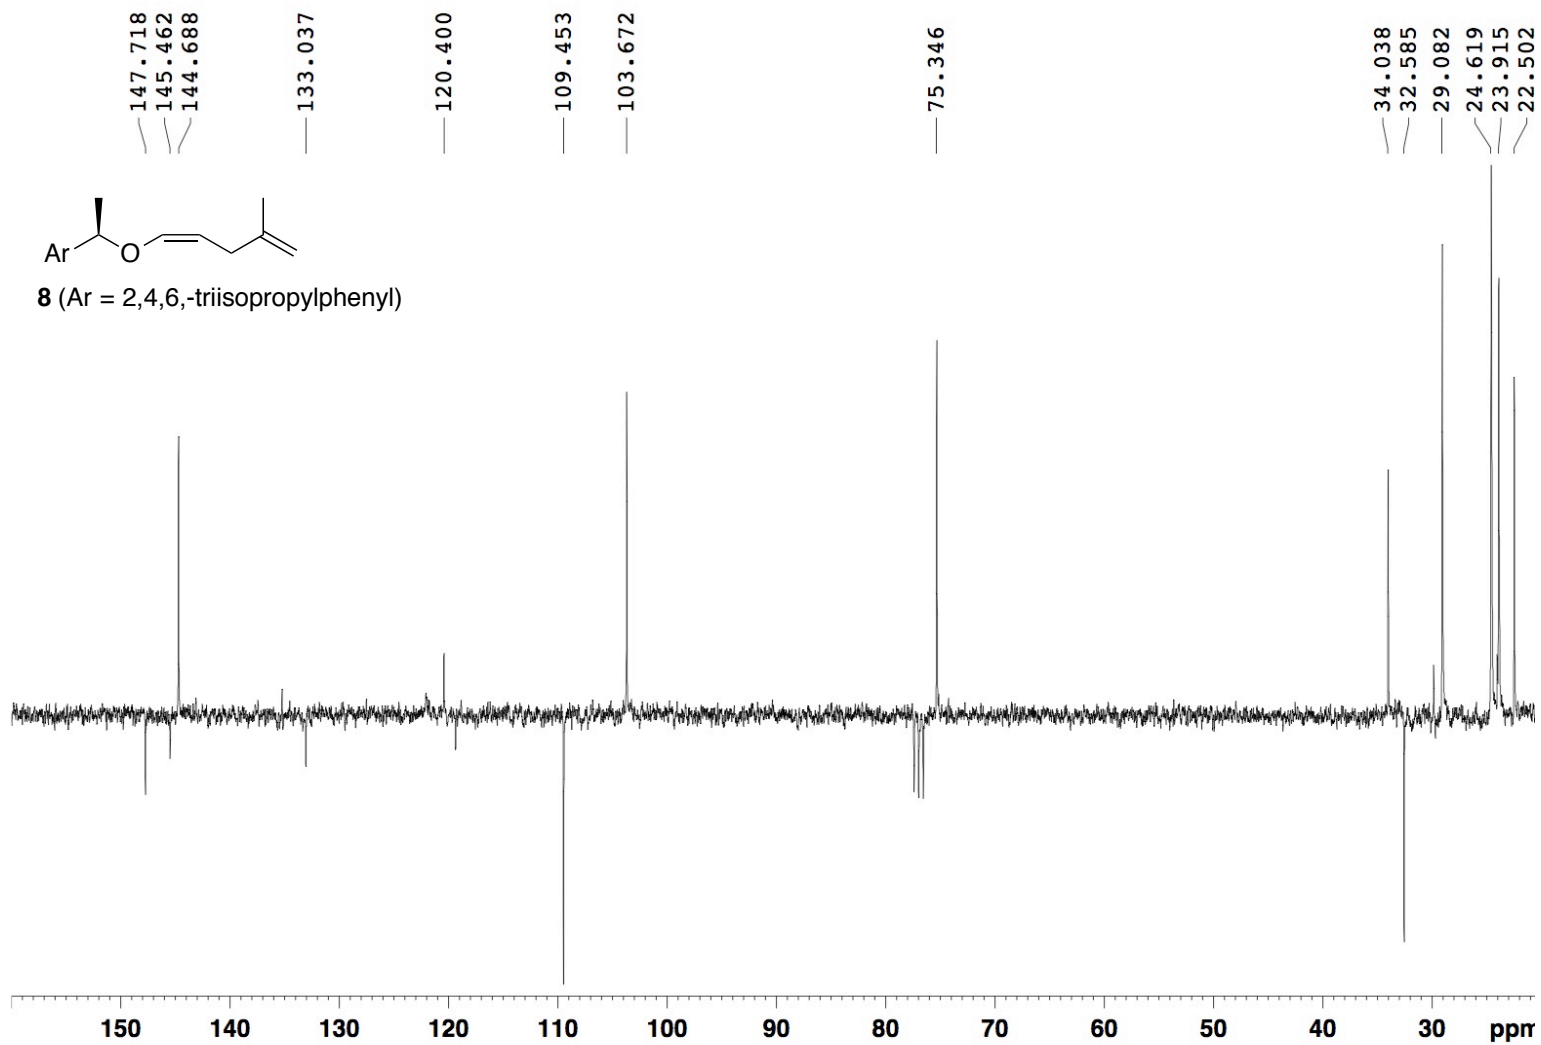

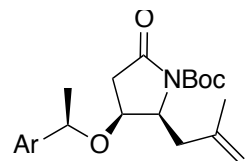

**9** (Ar = 2,4,6-triisopropylphenyl)

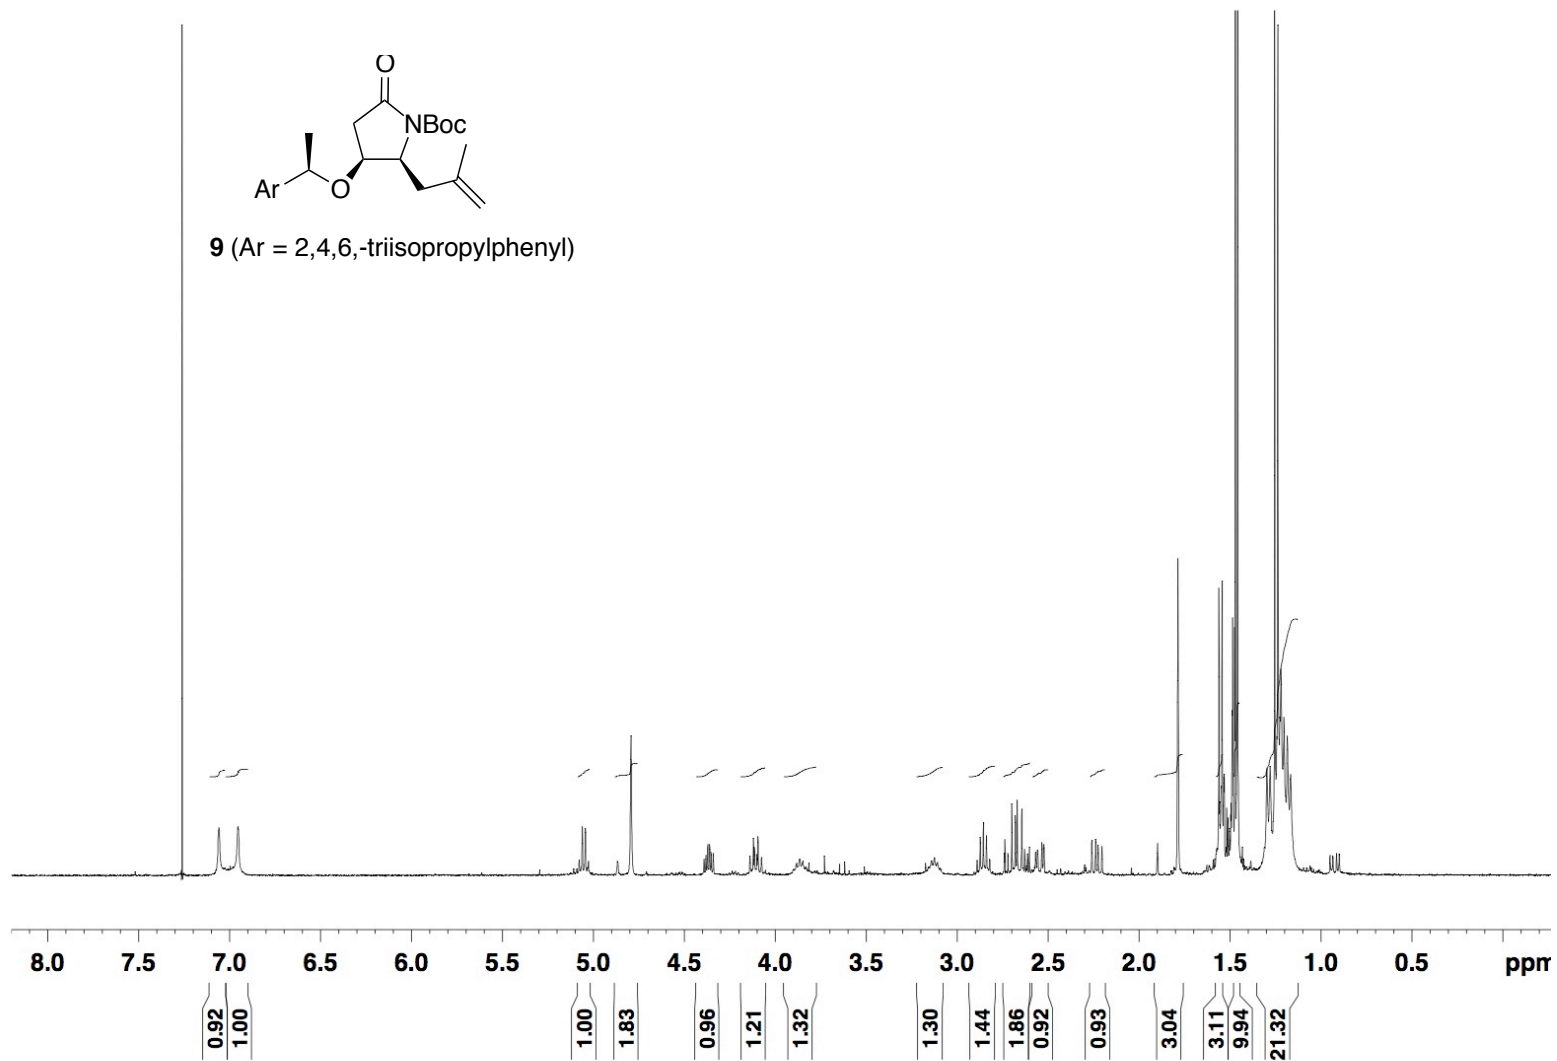

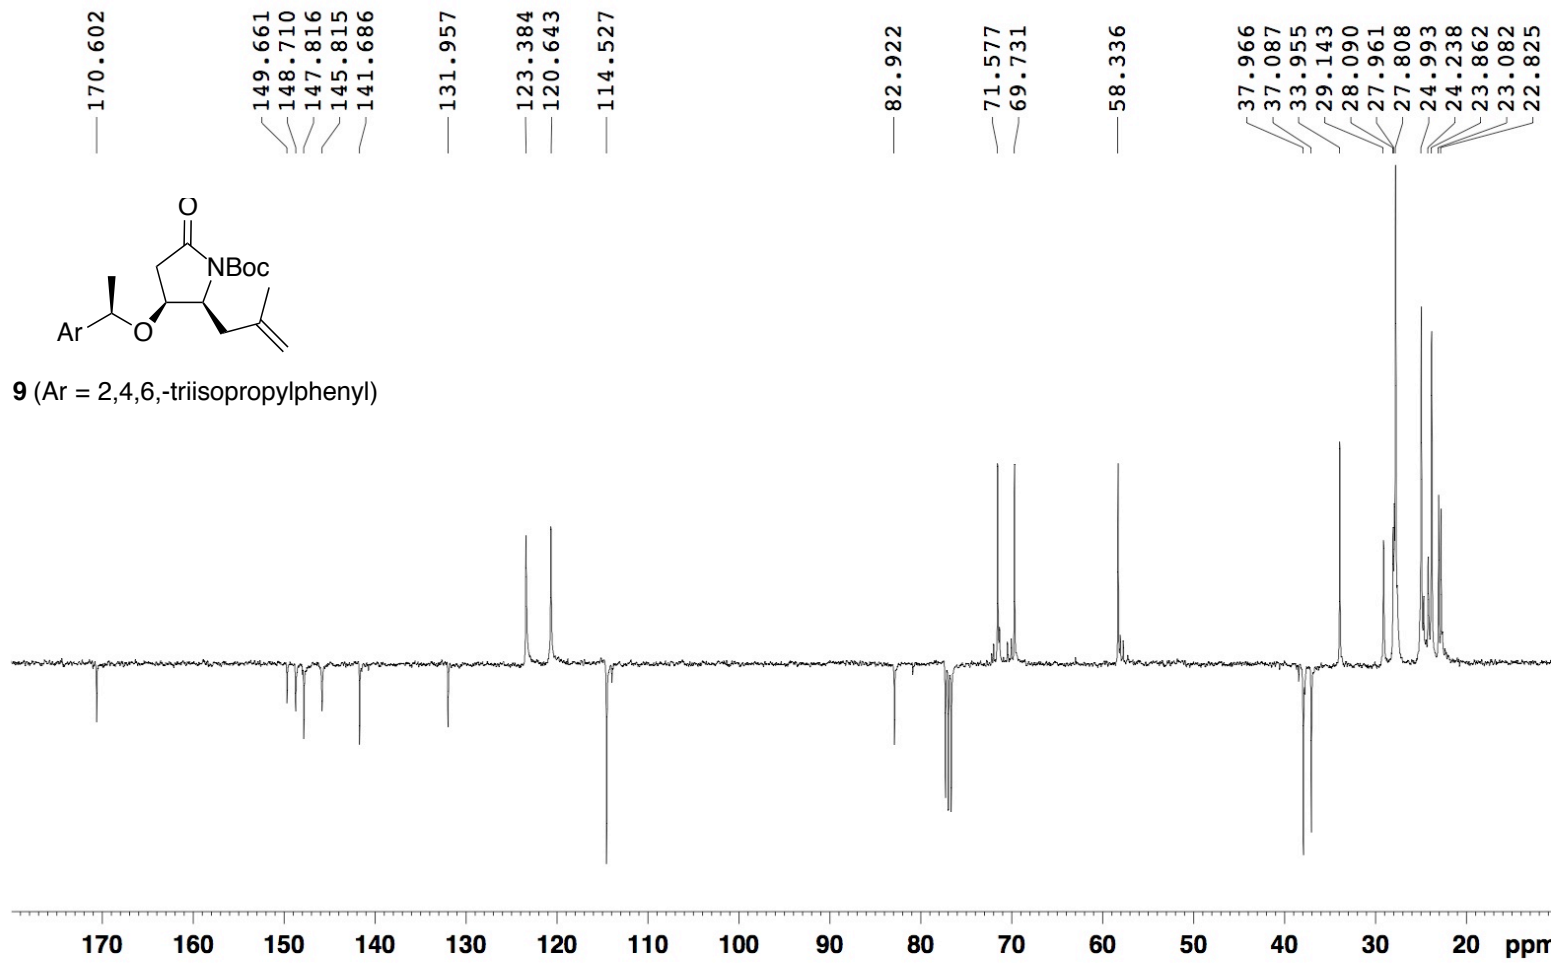

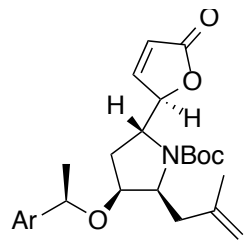

**10** (Ar = 2,4,6-triisopropylphenyl)

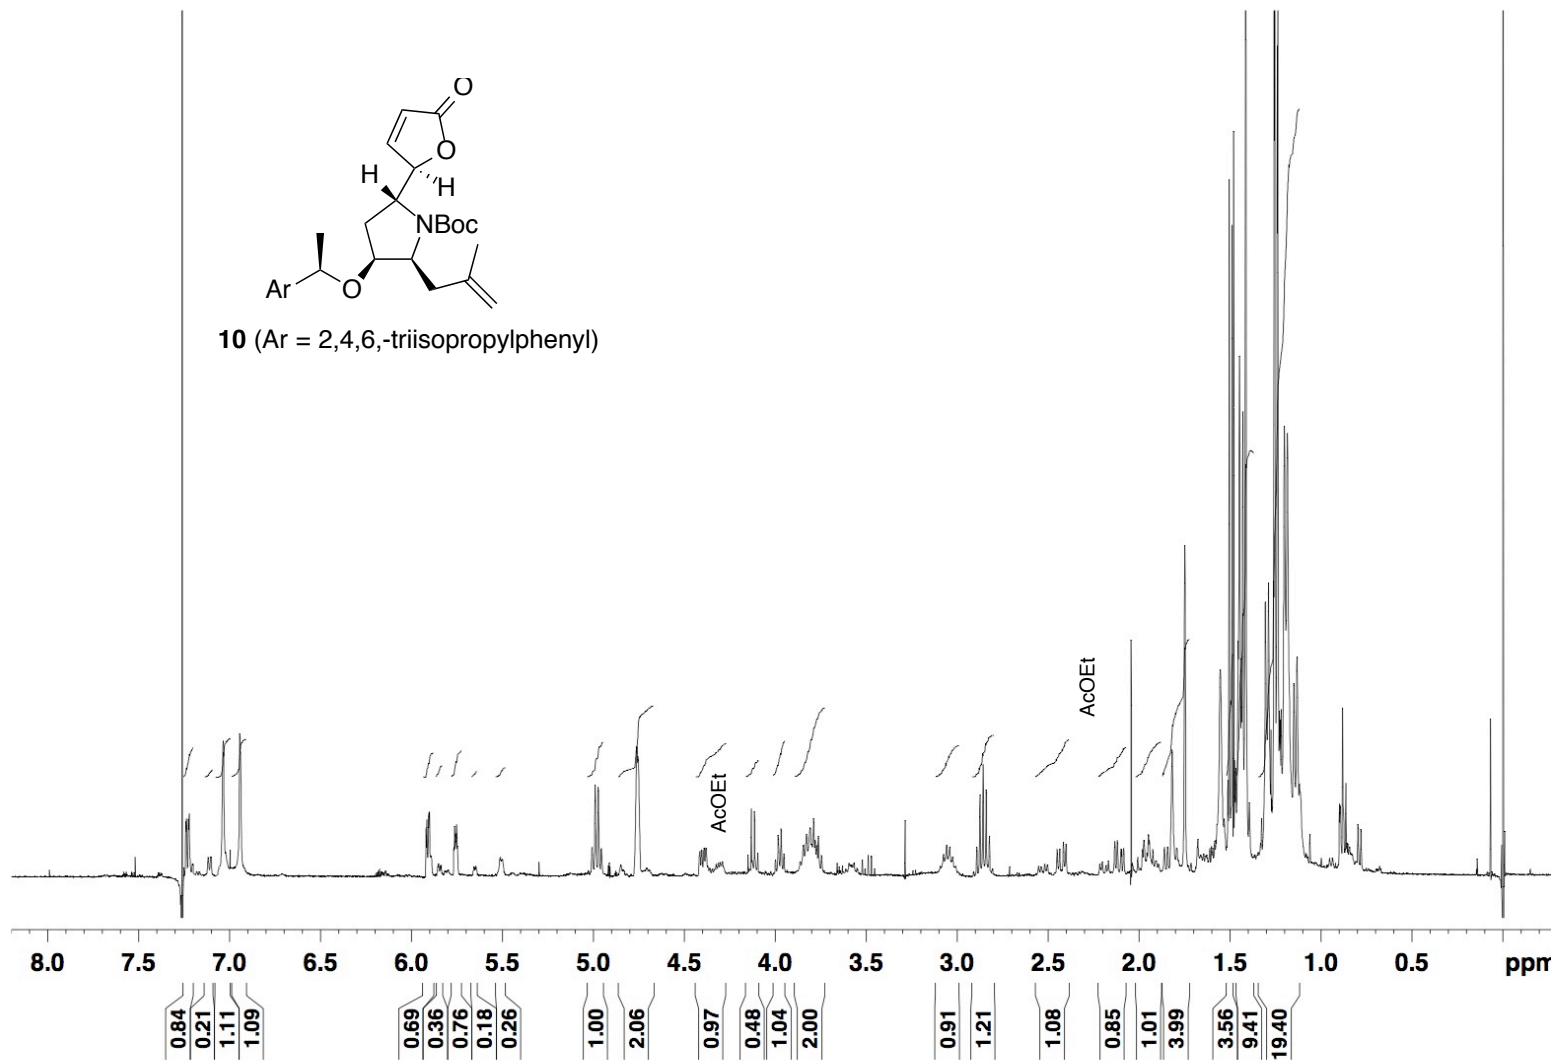

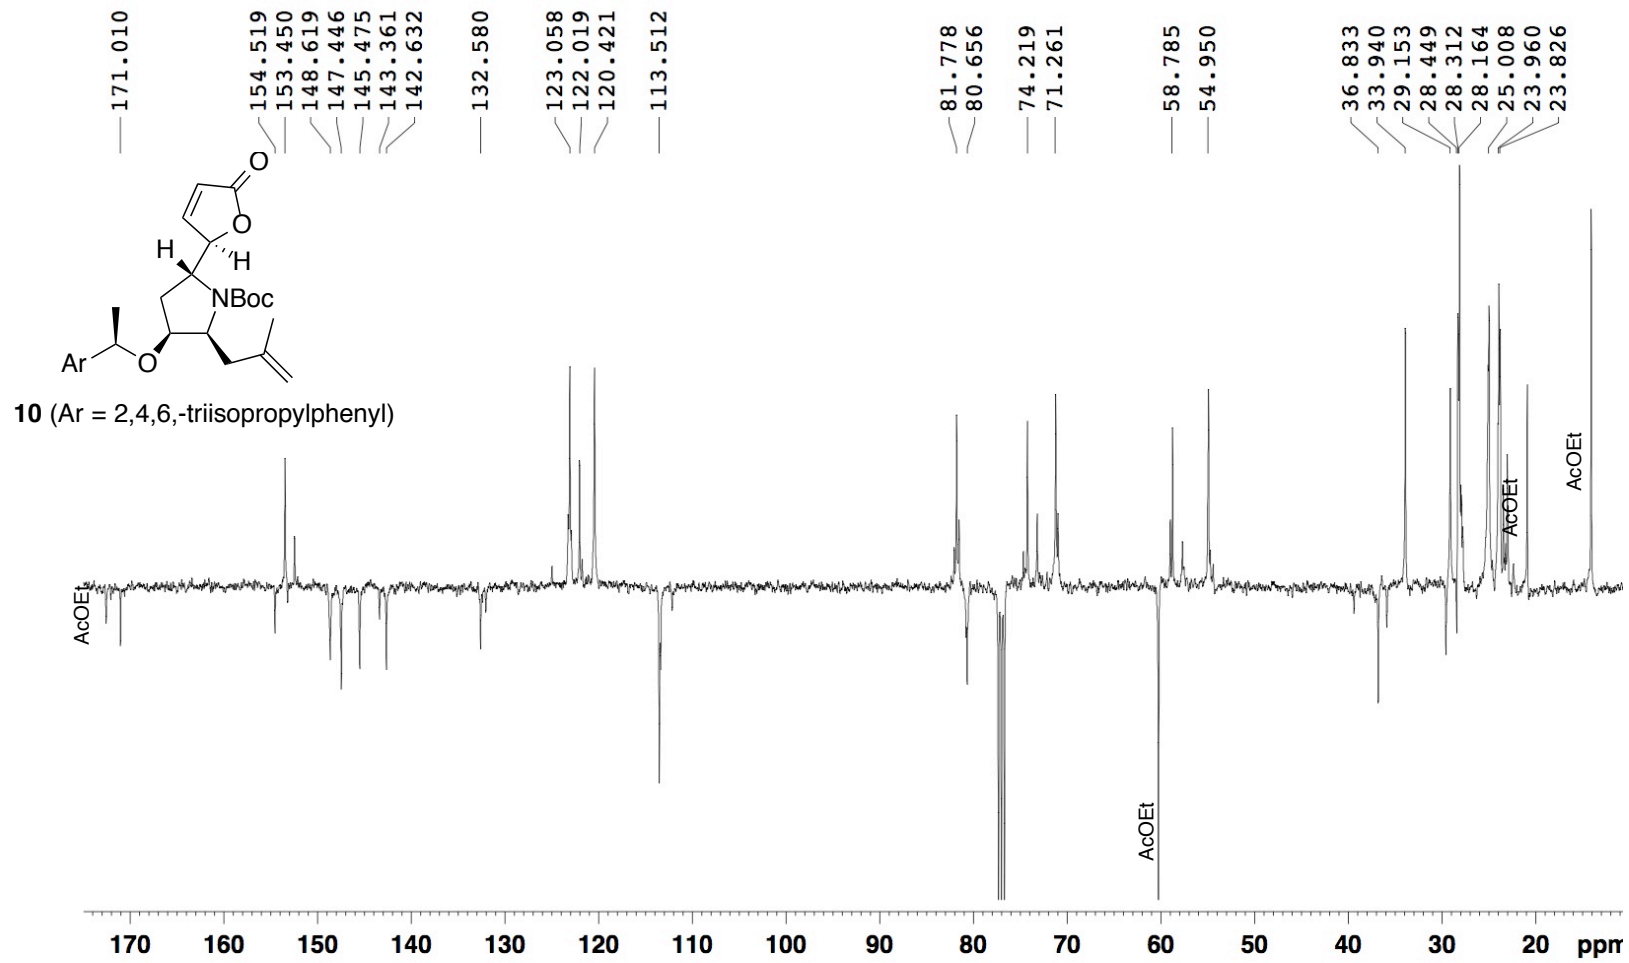

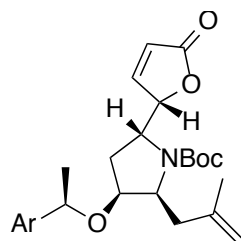

11 (Ar = 2,4,6,-triisopropylphenyl)

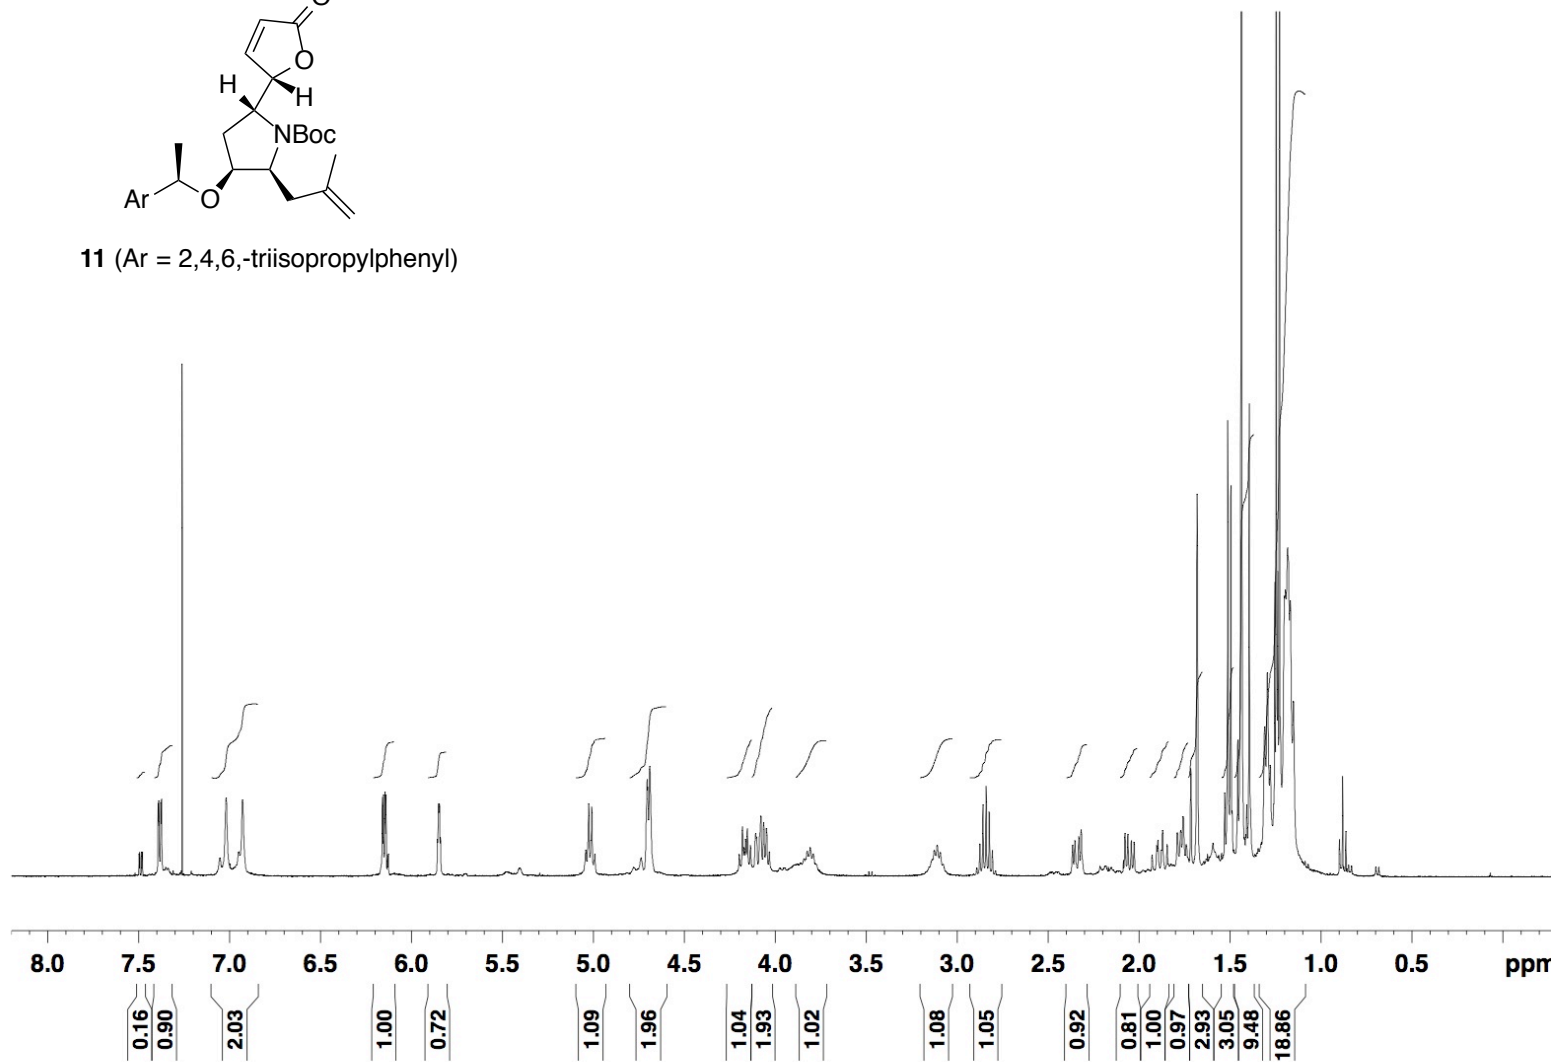



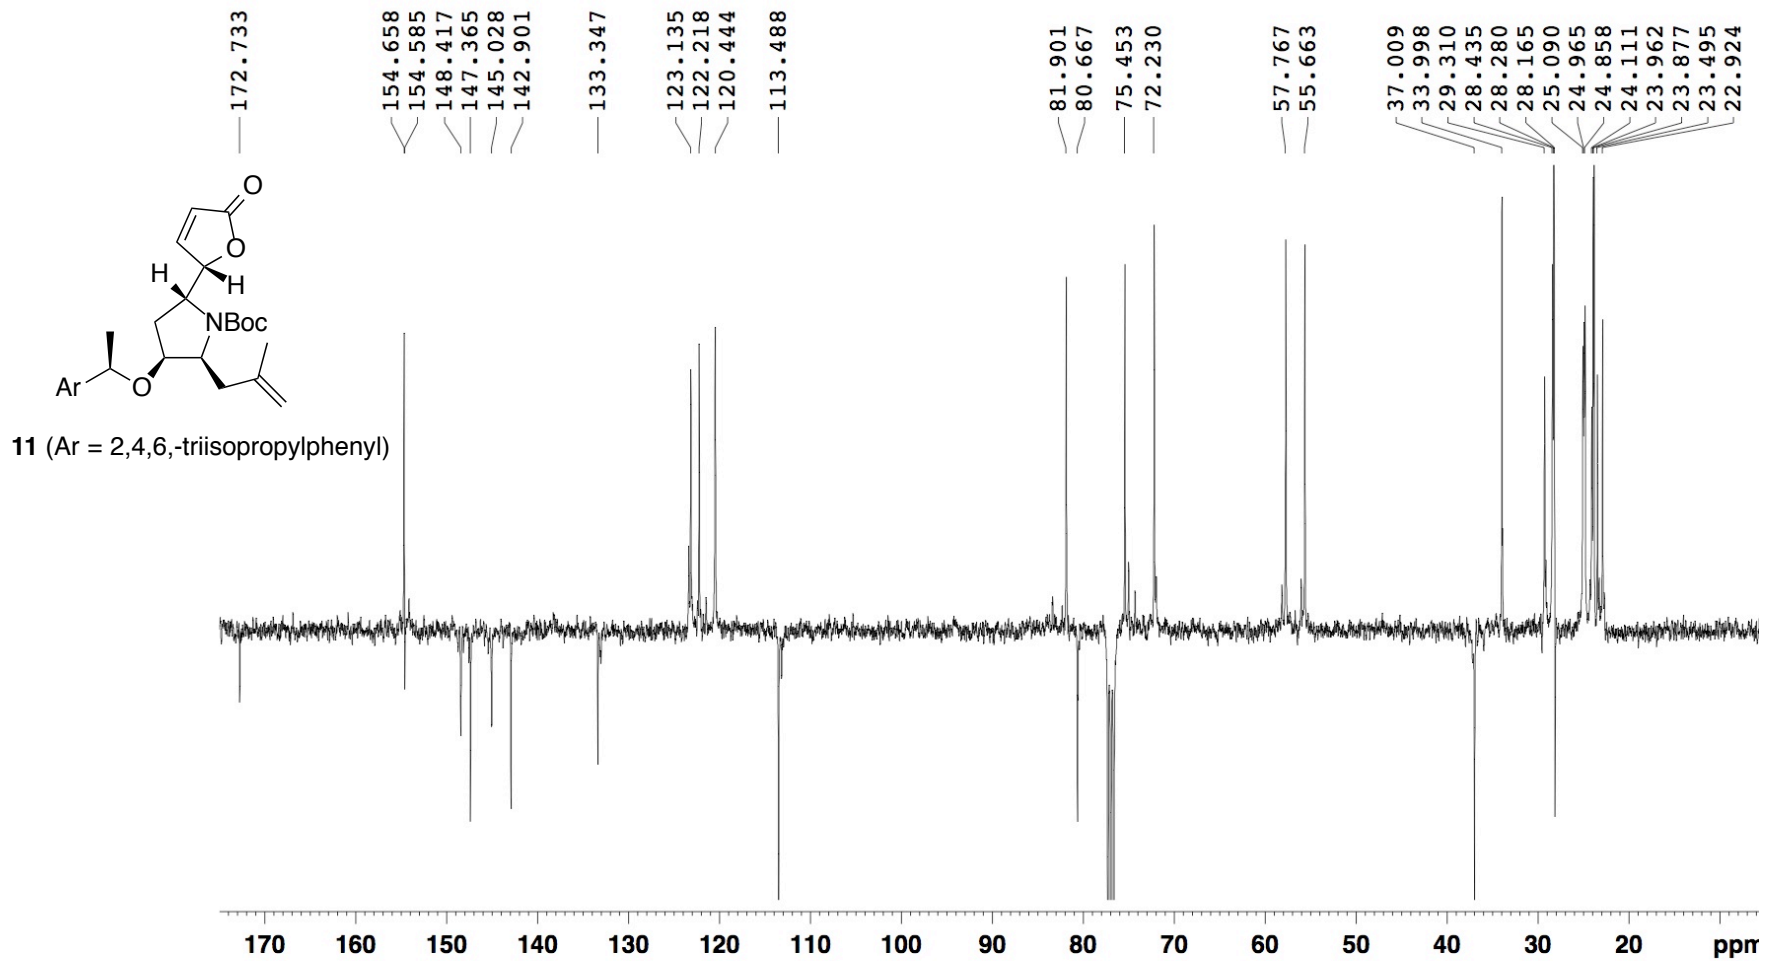

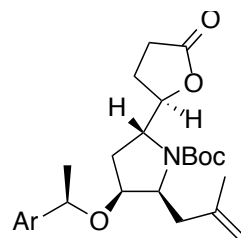

12 (Ar = 2,4,6,-triisopropylphenyl)

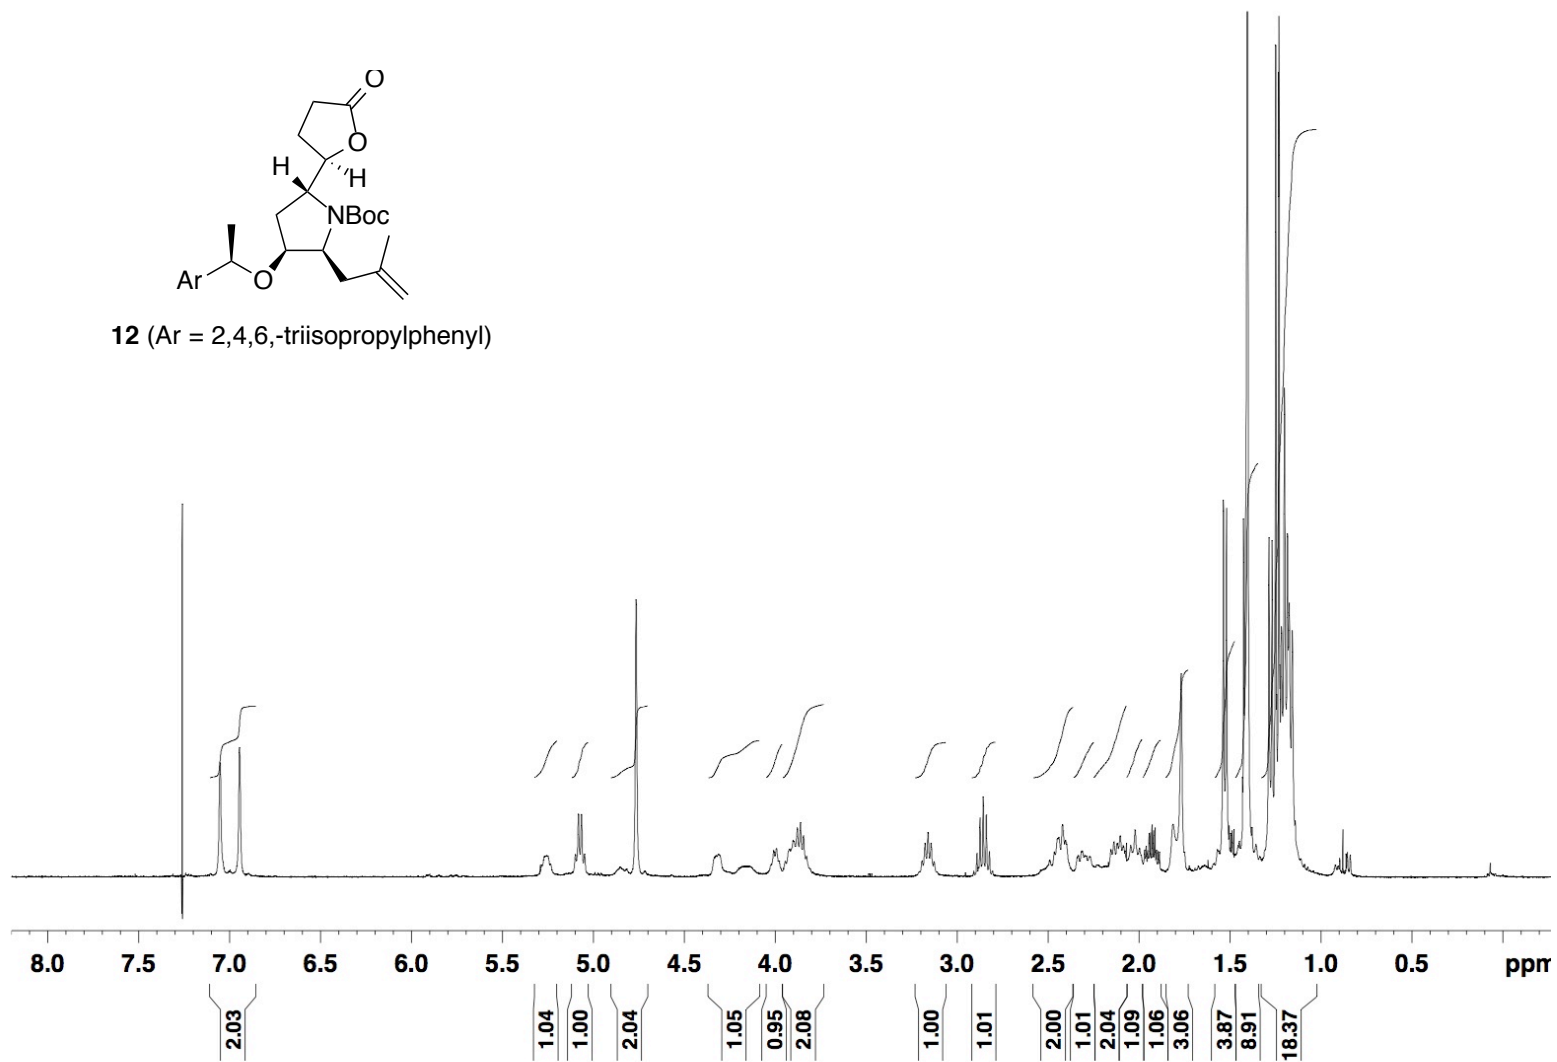

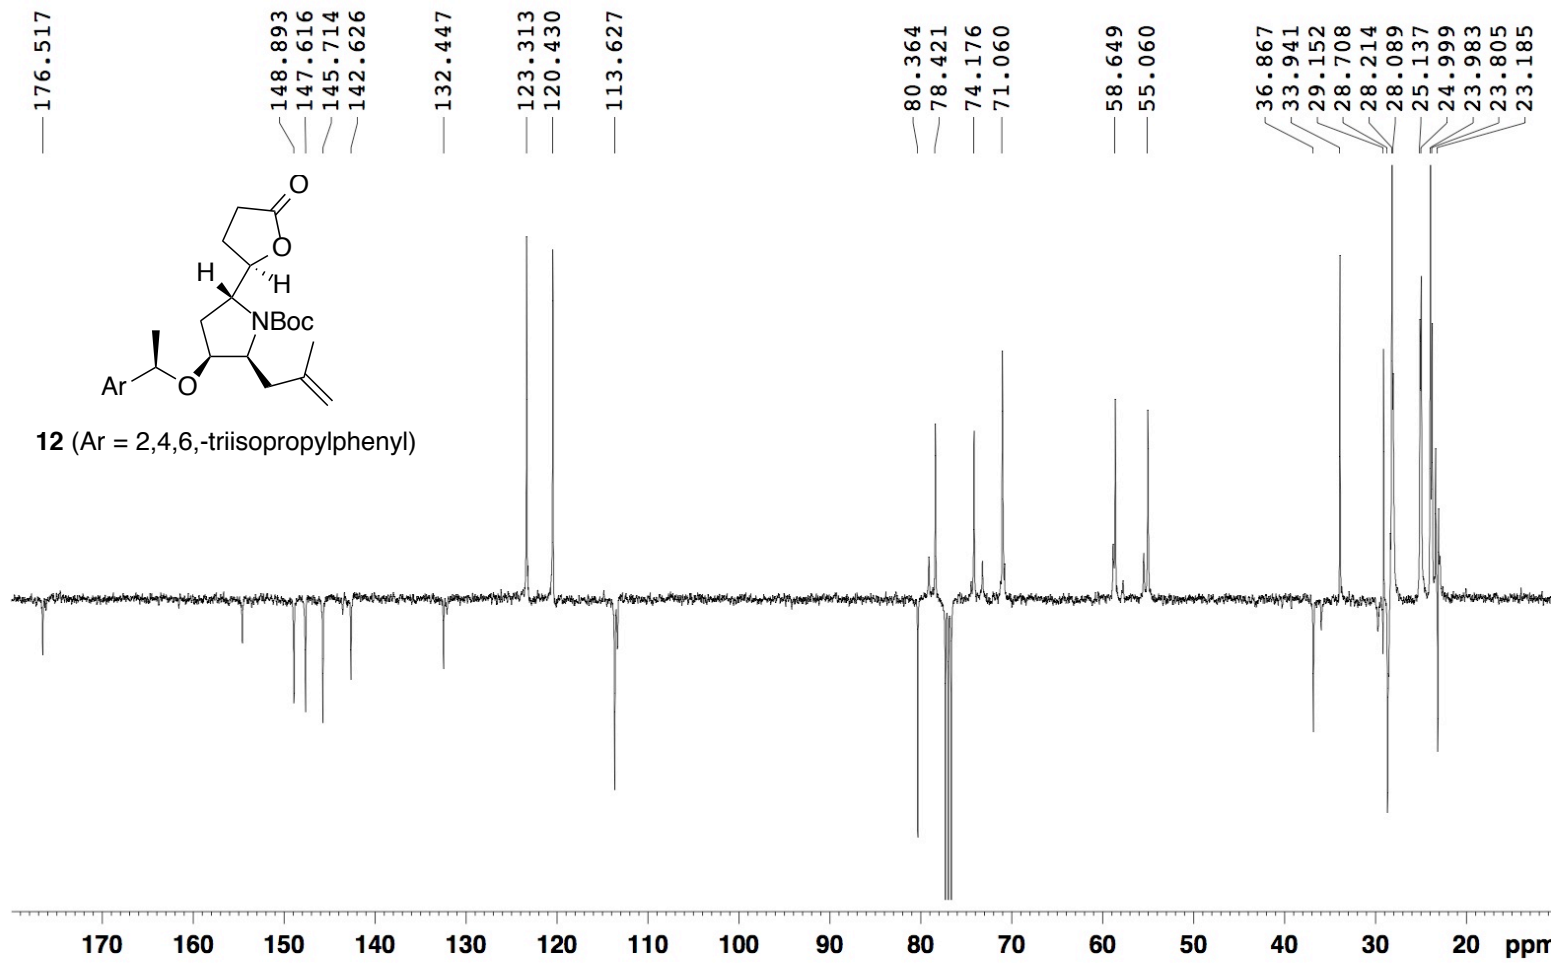

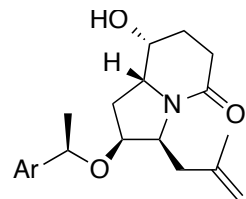

**13** (Ar = 2,4,6-triisopropylphenyl)

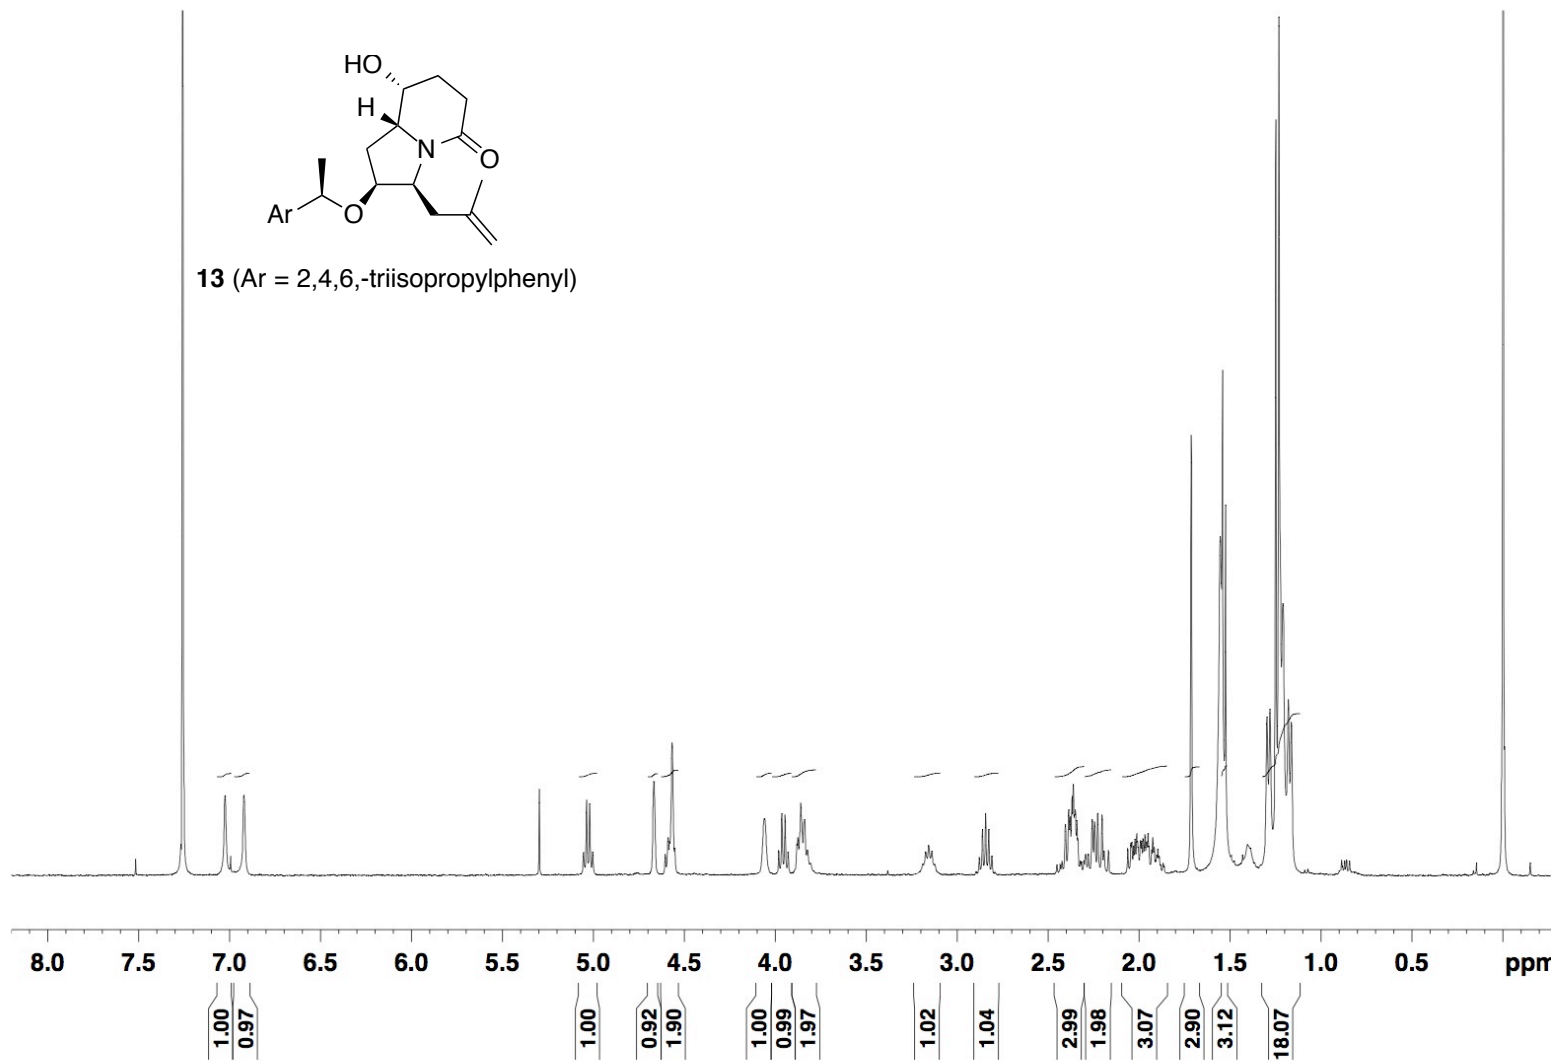

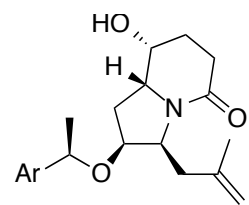

**13** (Ar = 2,4,6,-triisopropylphenyl)

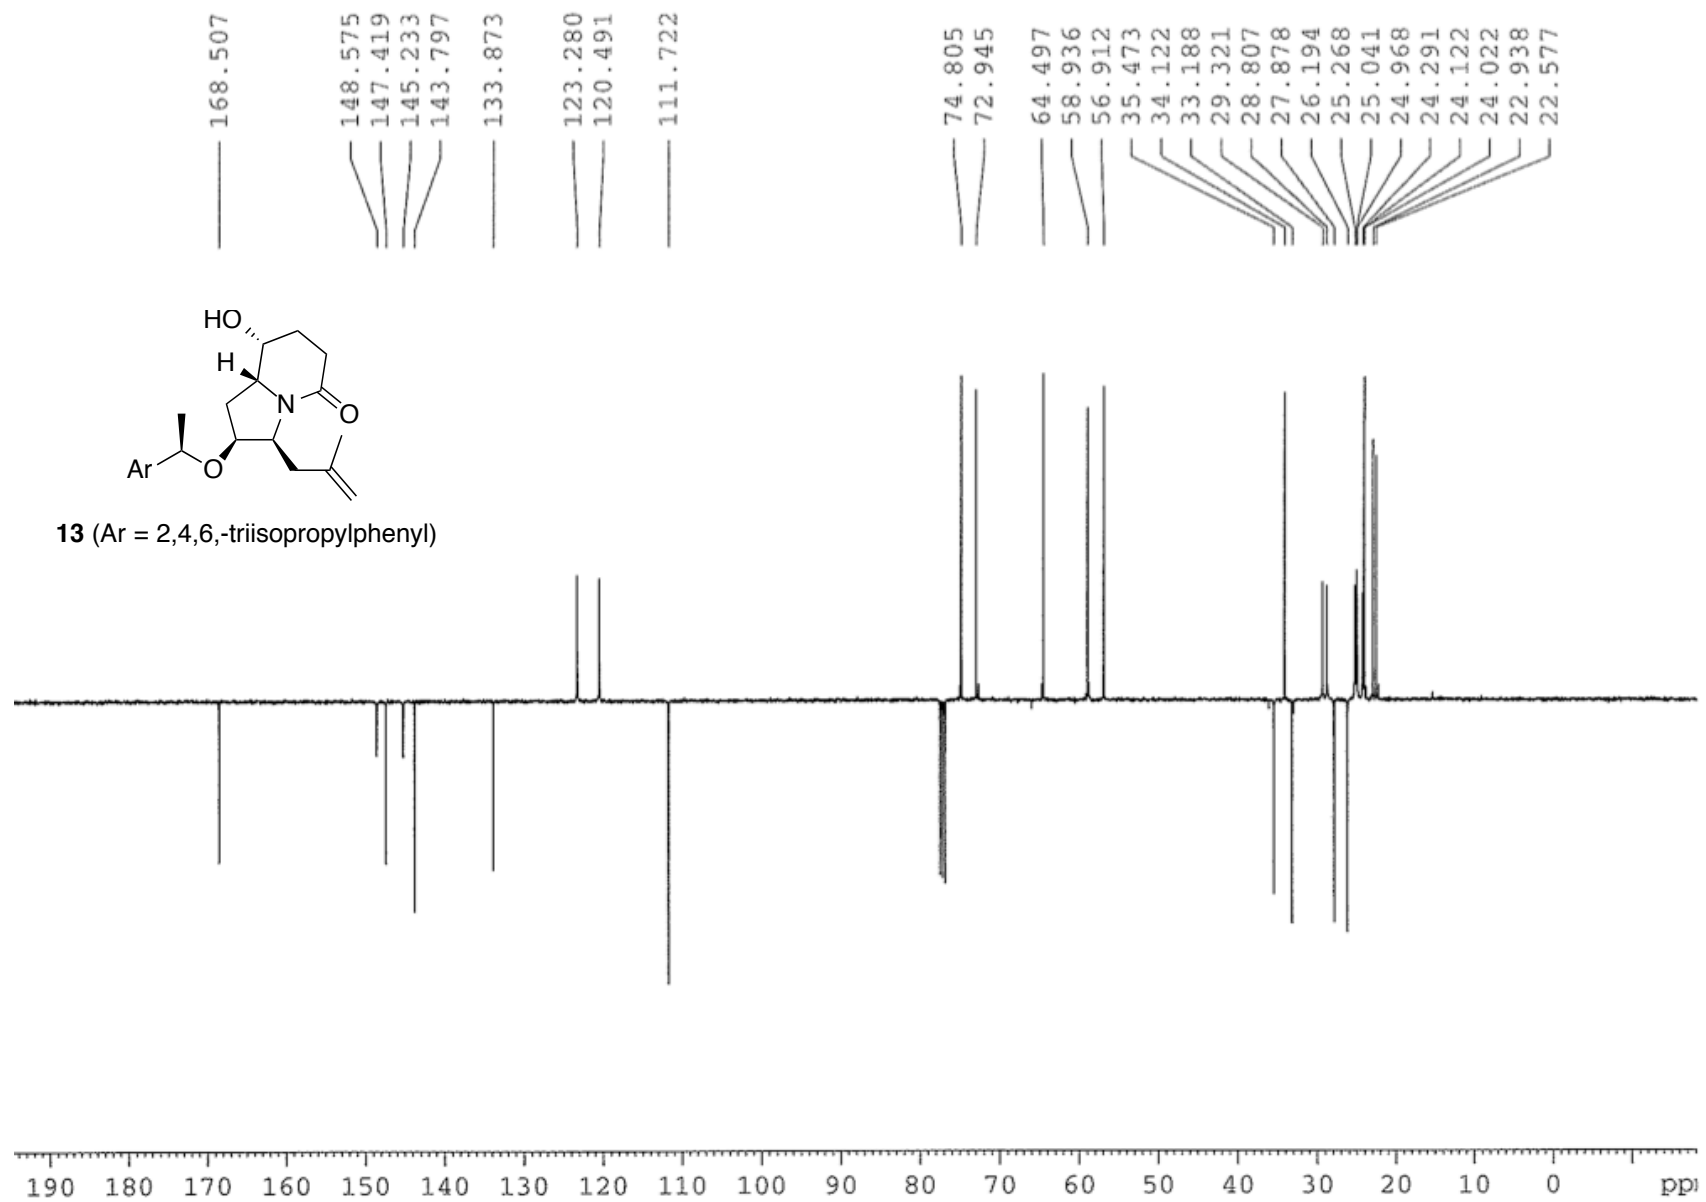

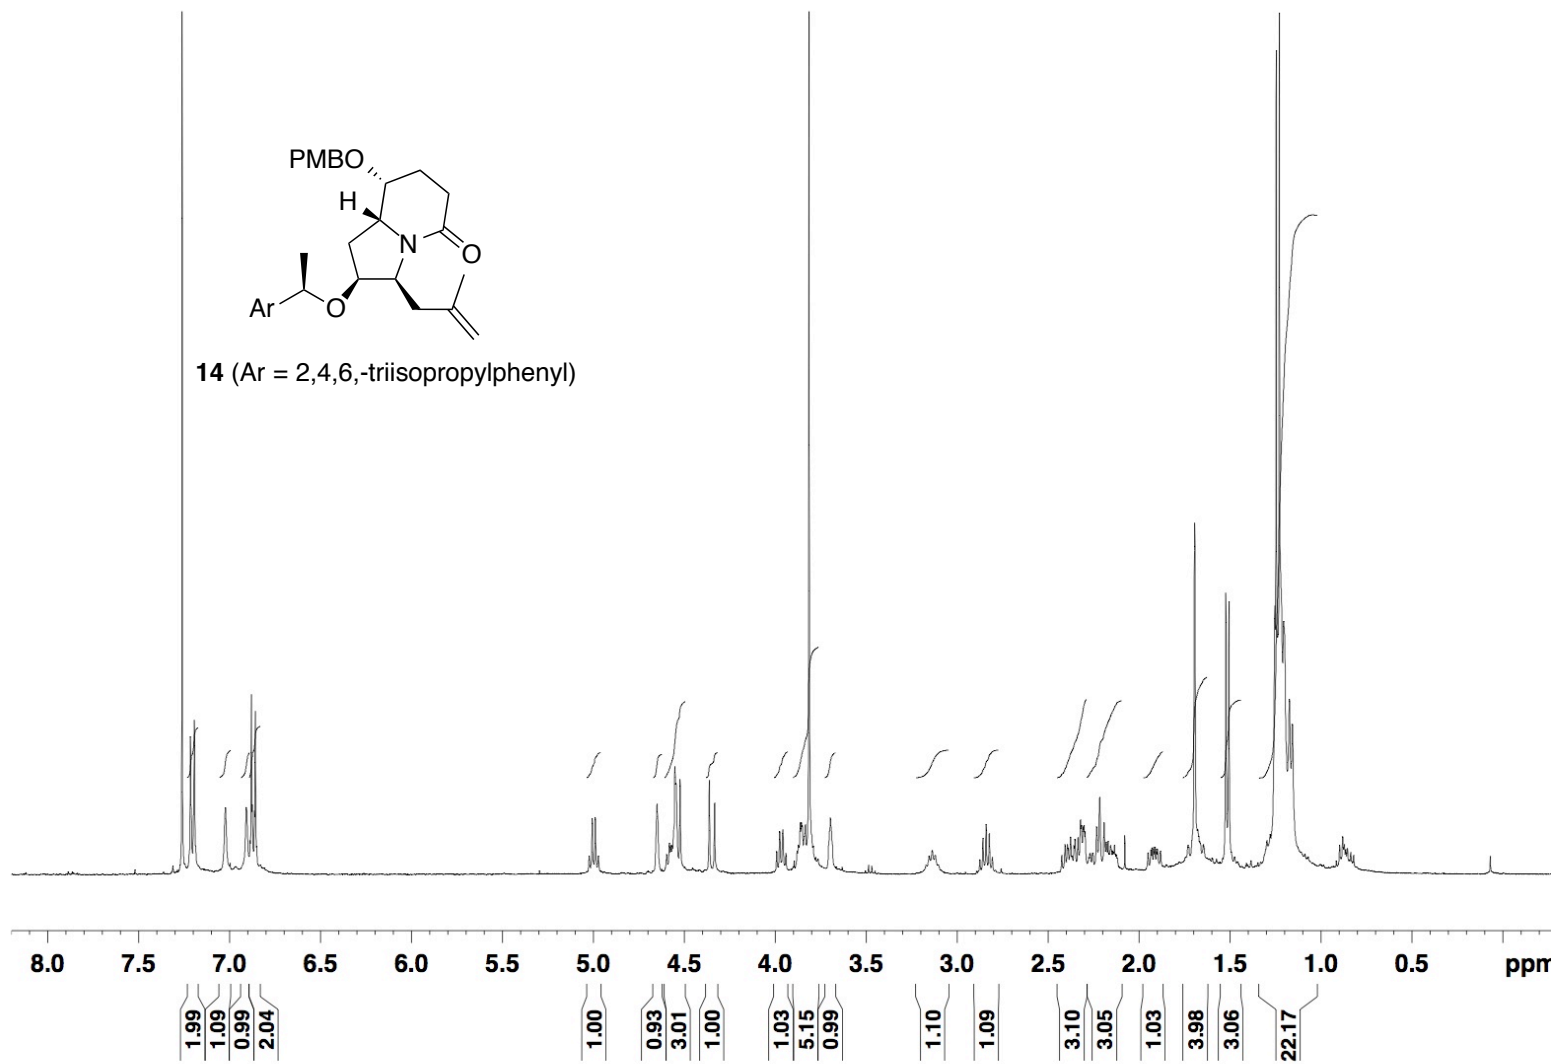

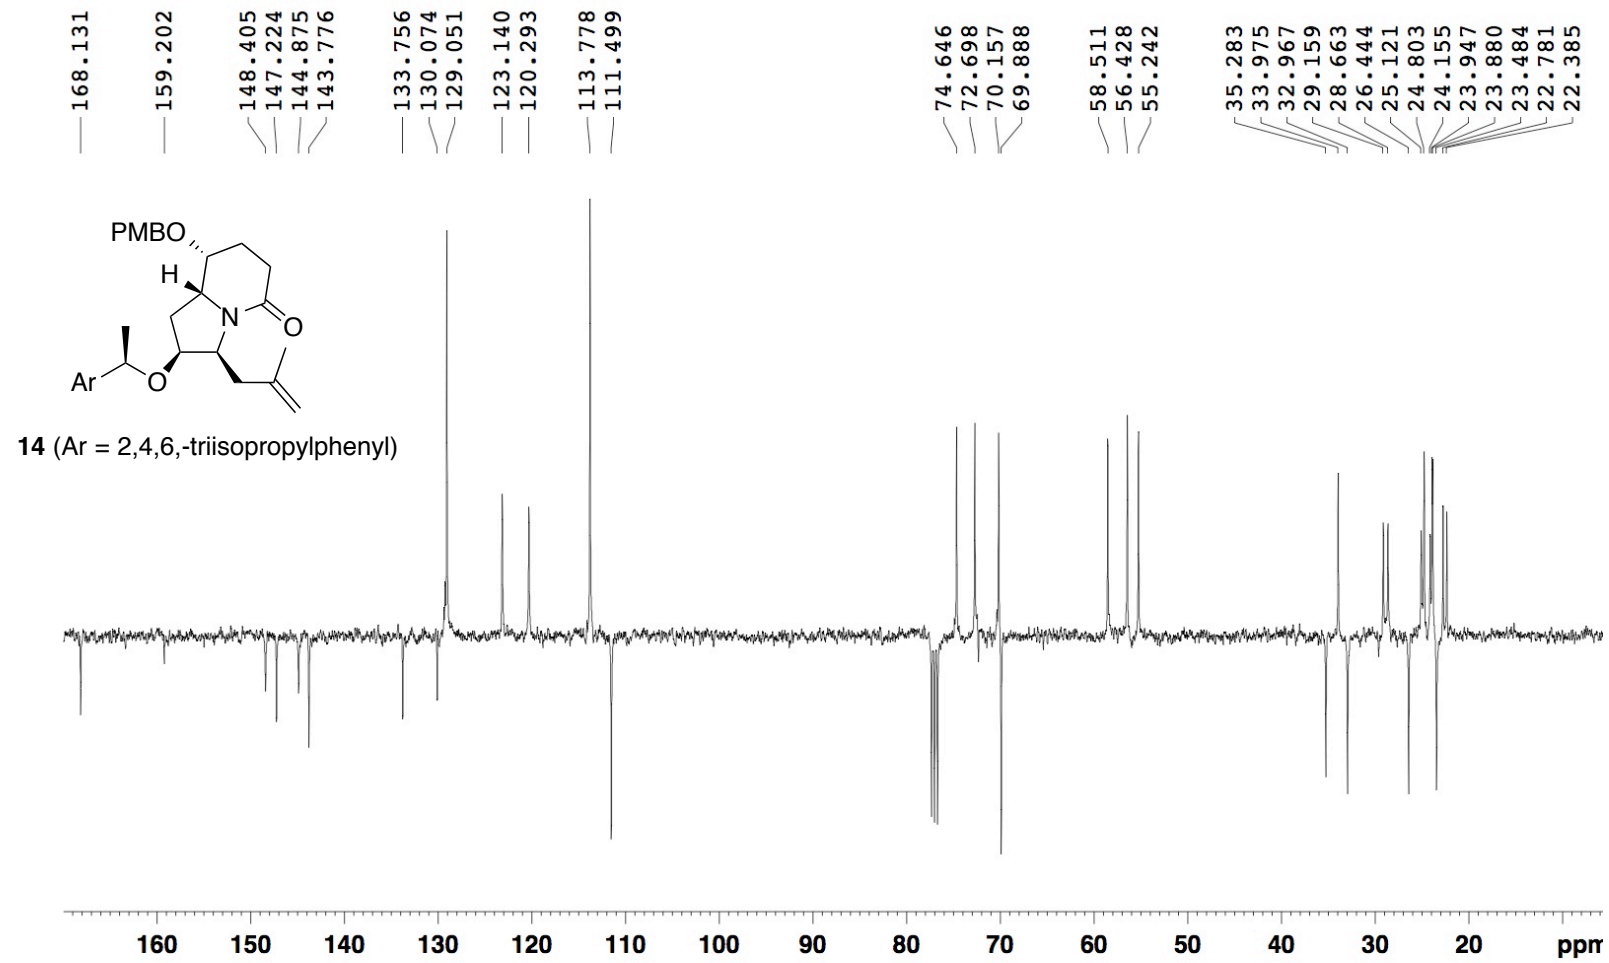

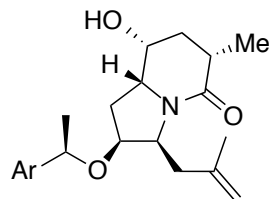

**15** (Ar = 2,4,6-triisopropylphenyl)

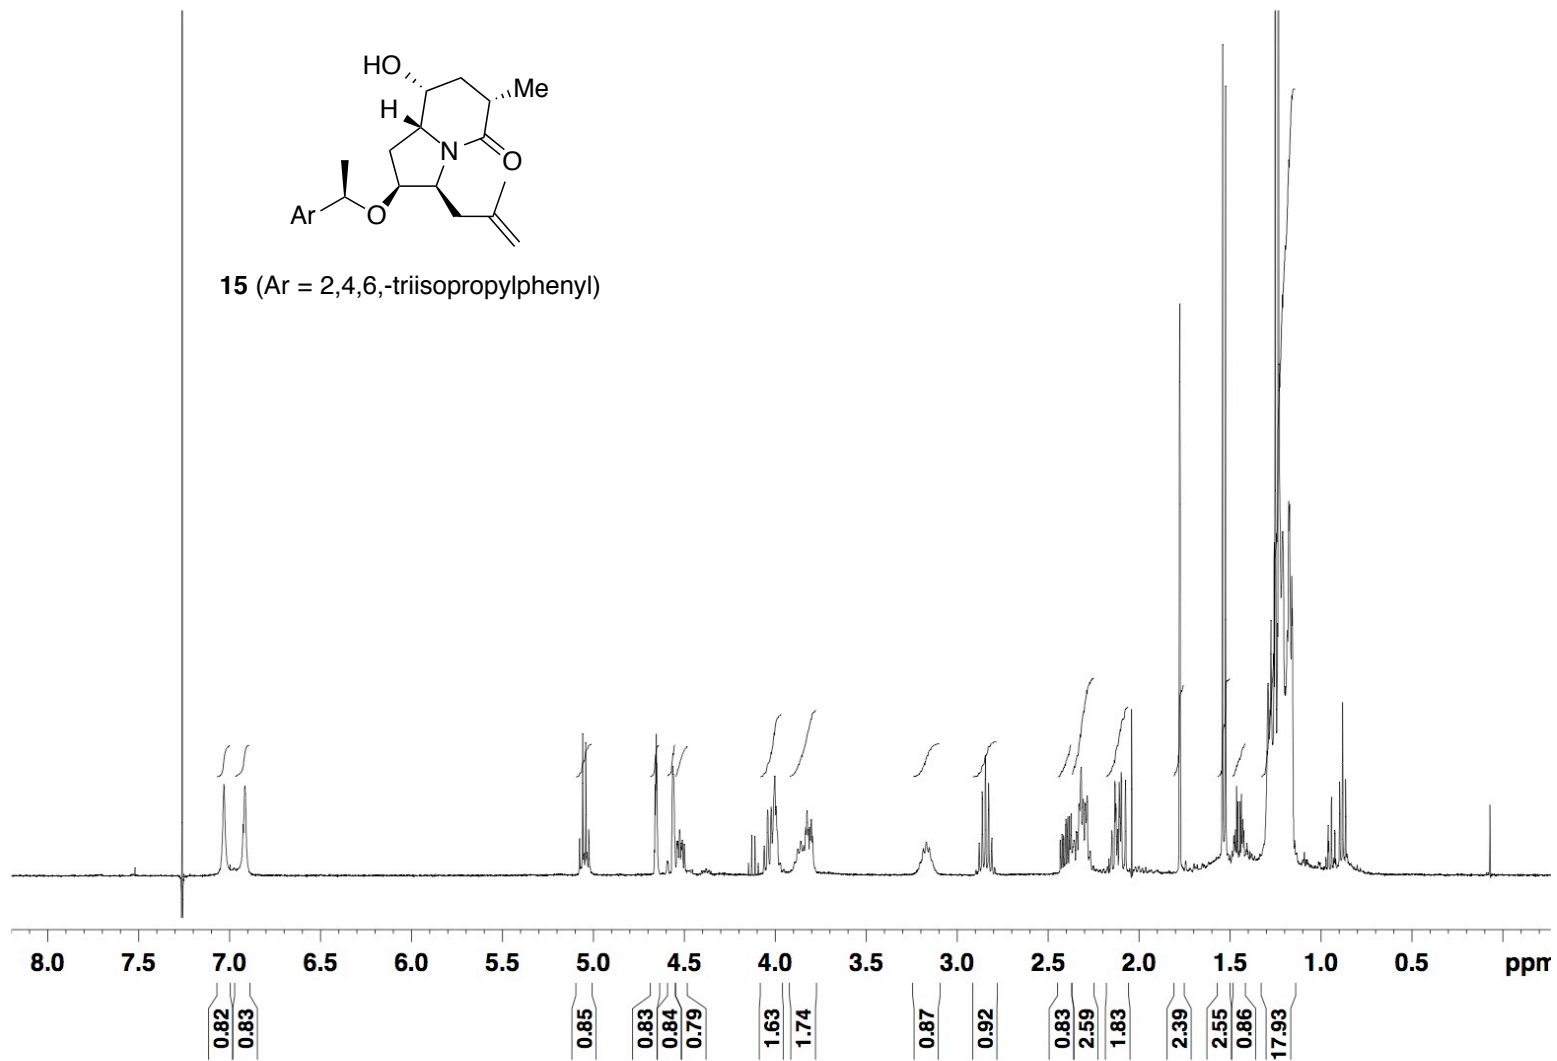



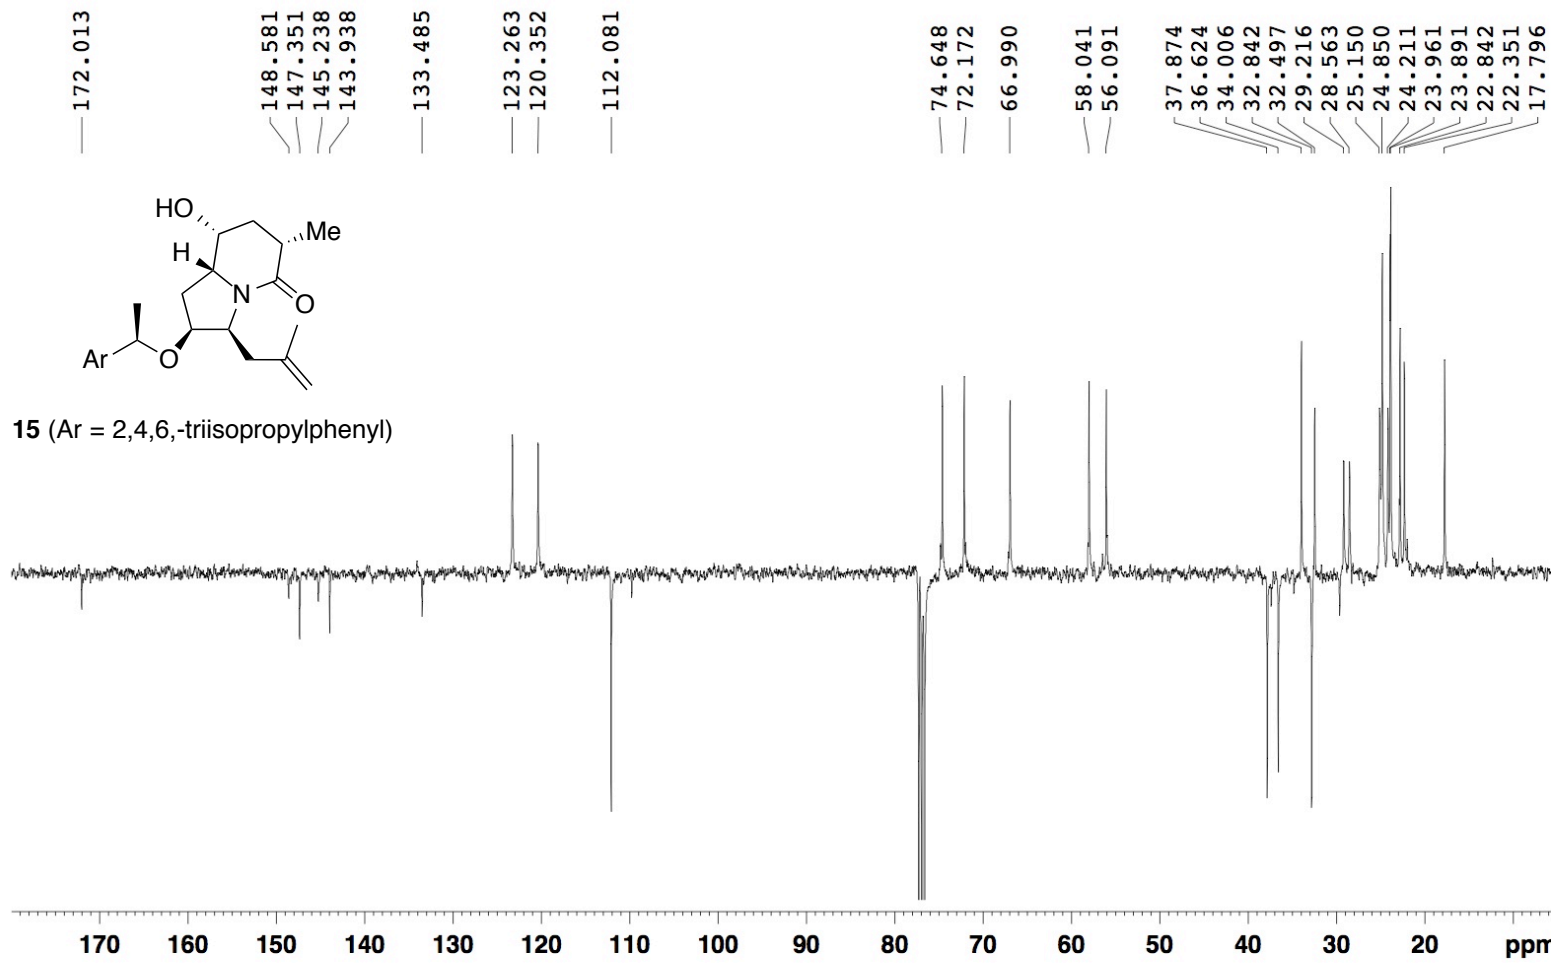

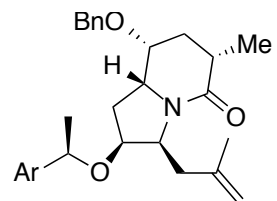

**16** (Ar = 2,4,6,-trisopropylphenyl)

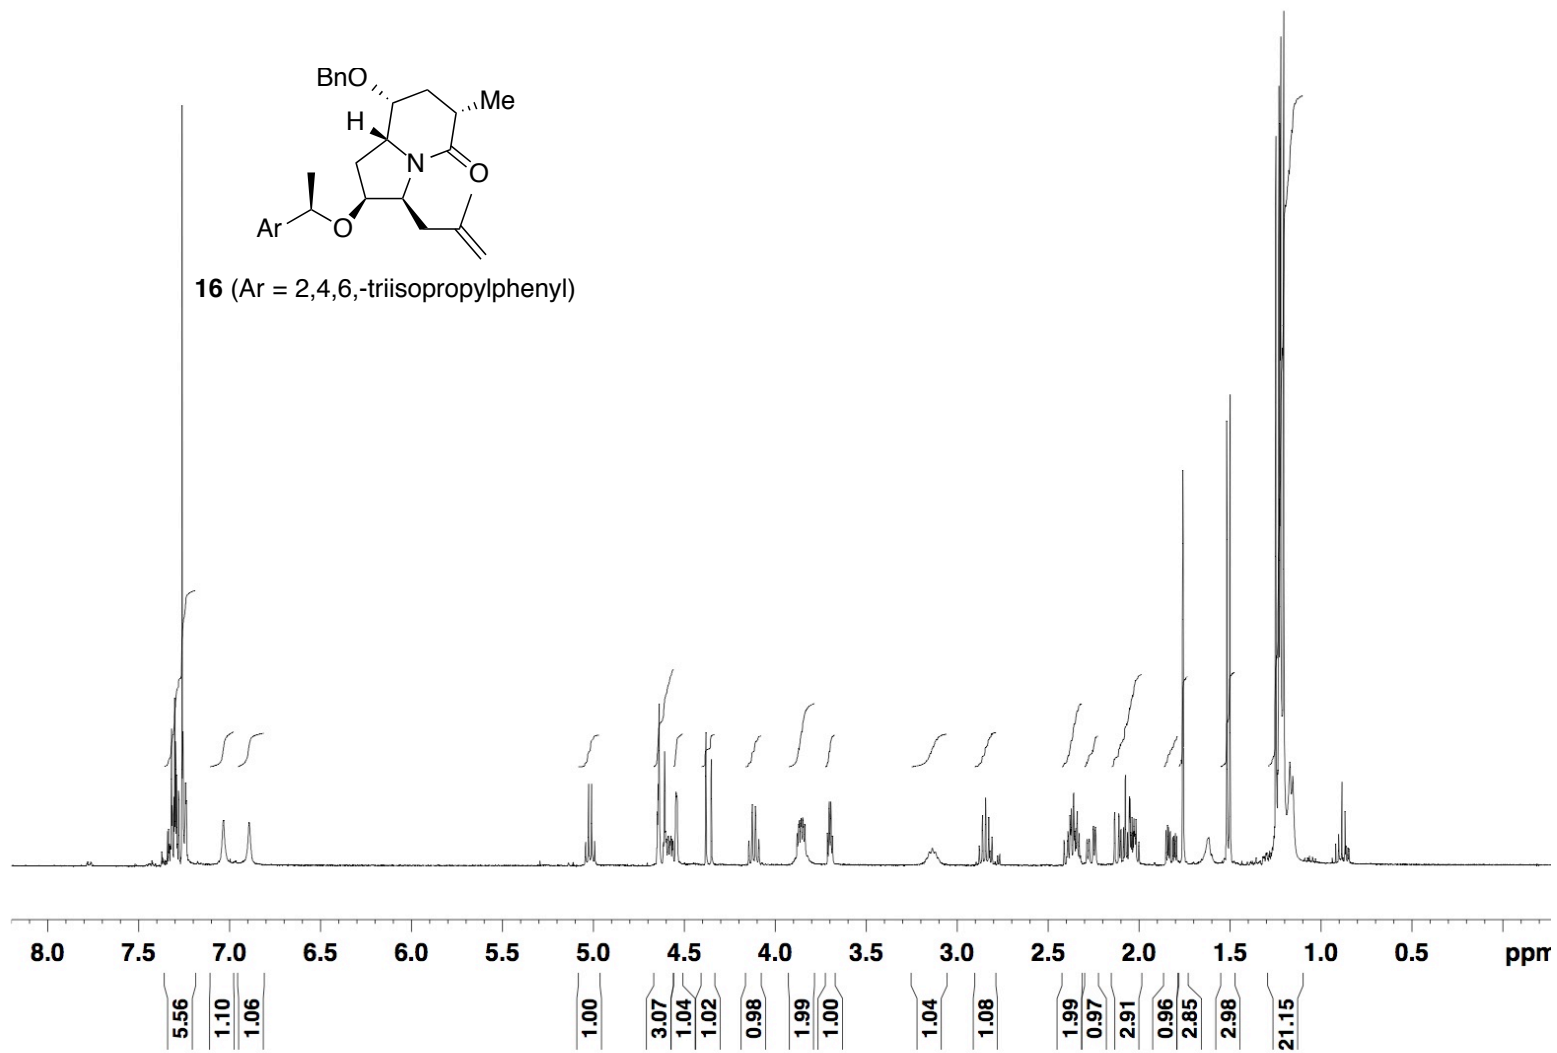

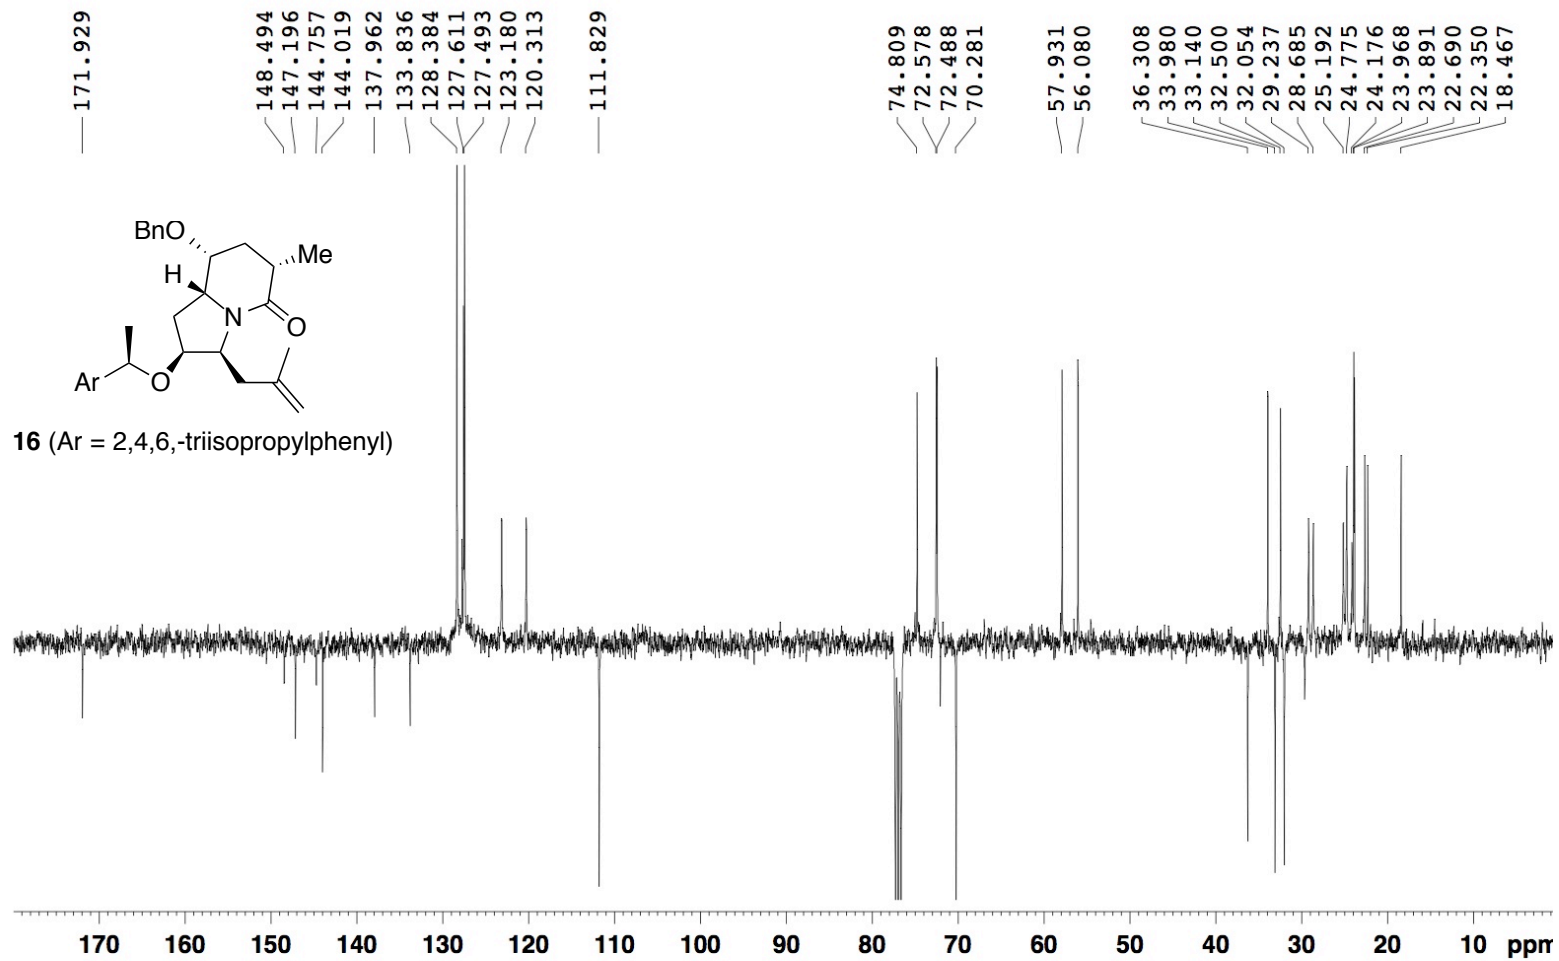

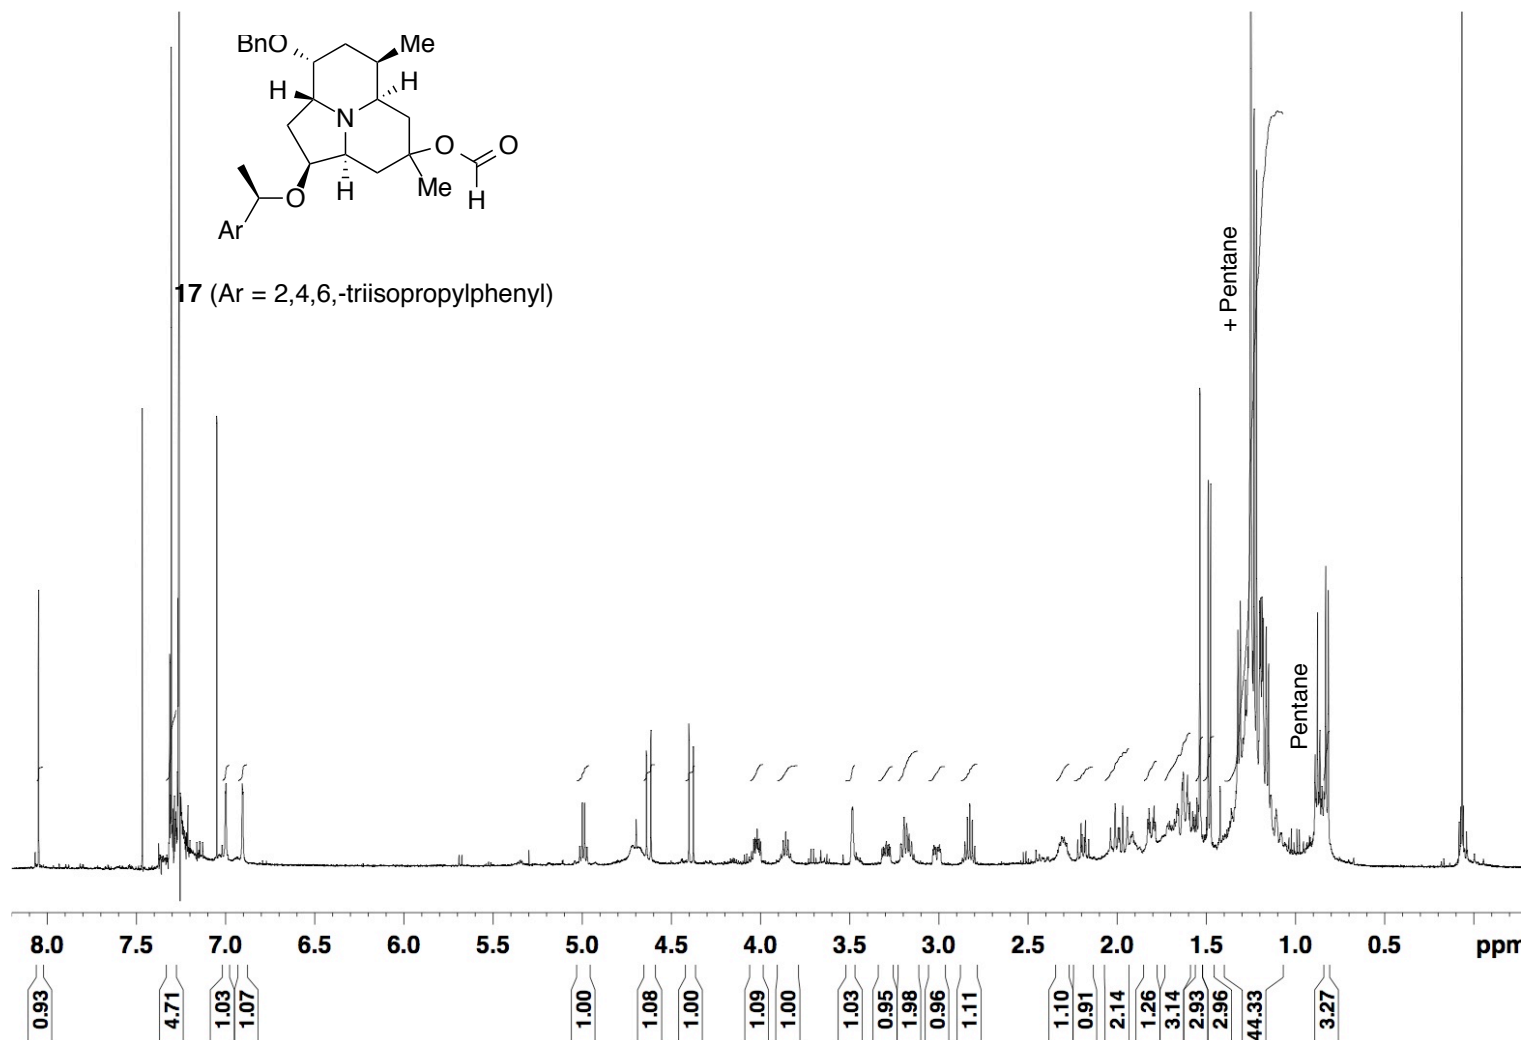

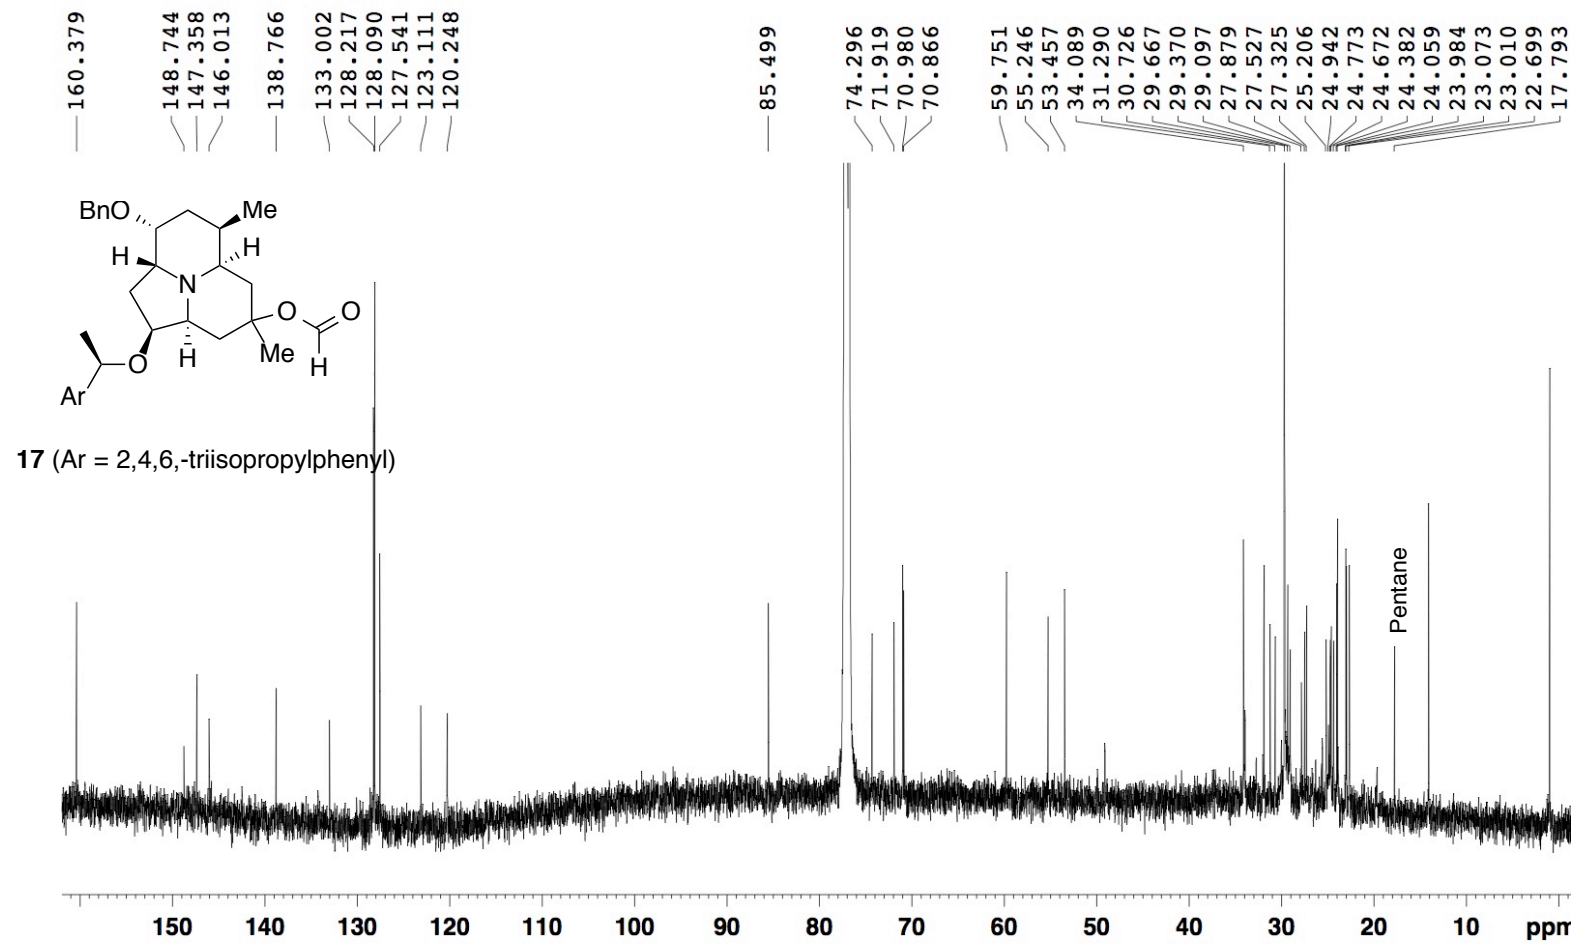

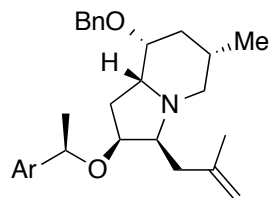

**18** (Ar = 2,4,6-triisopropylphenyl)

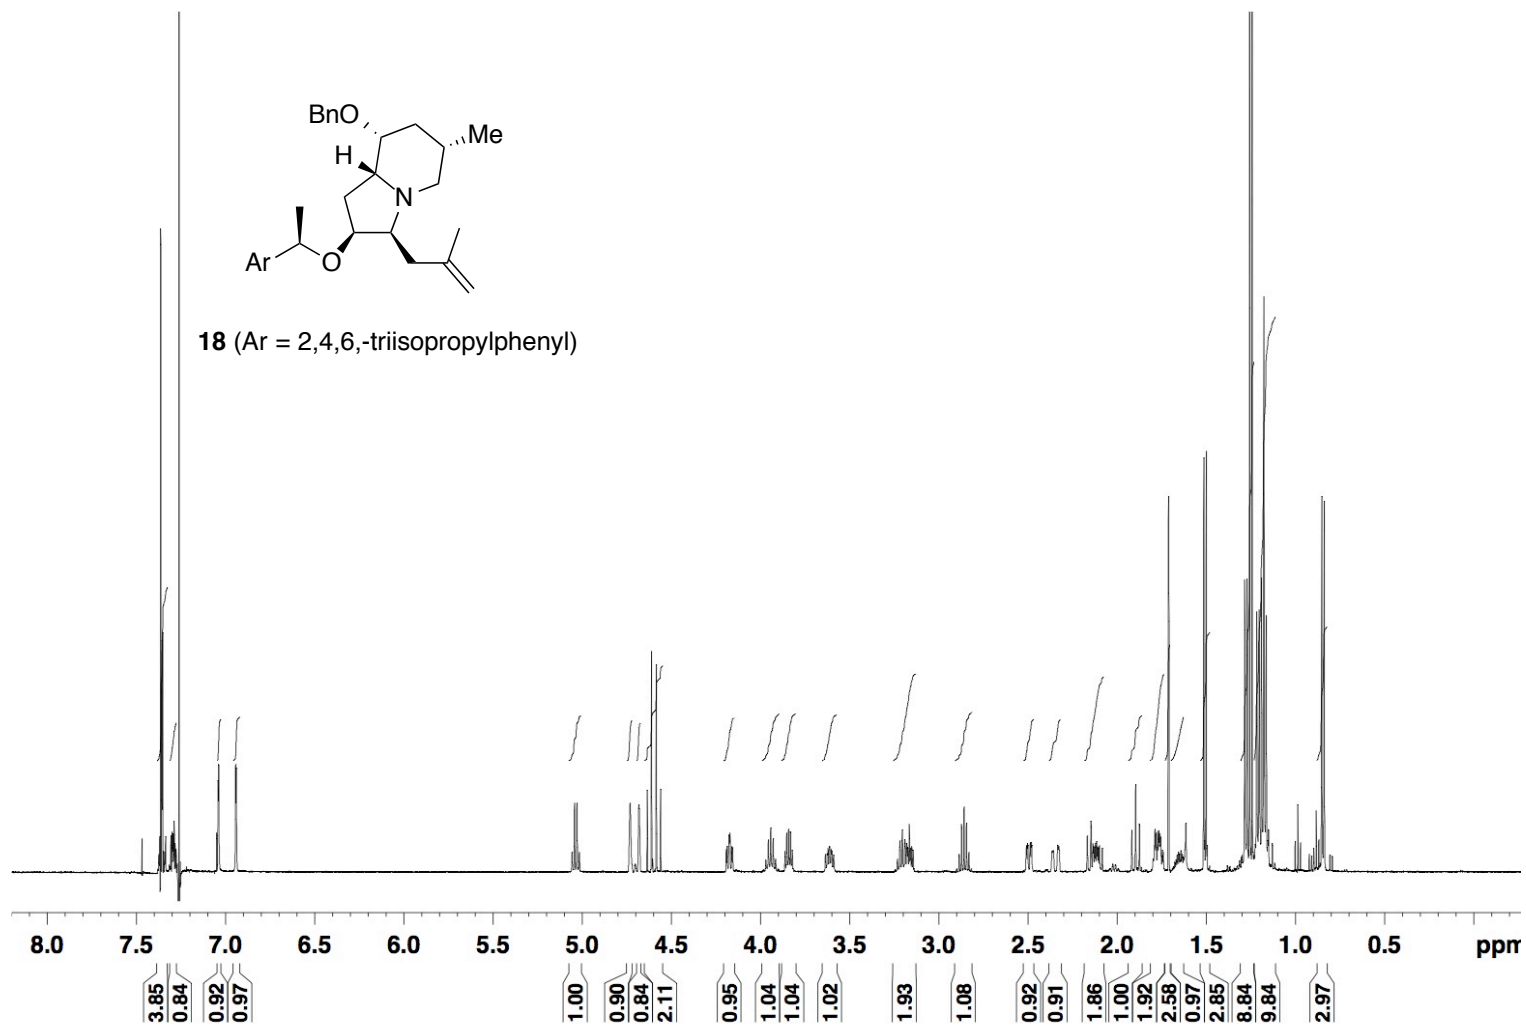

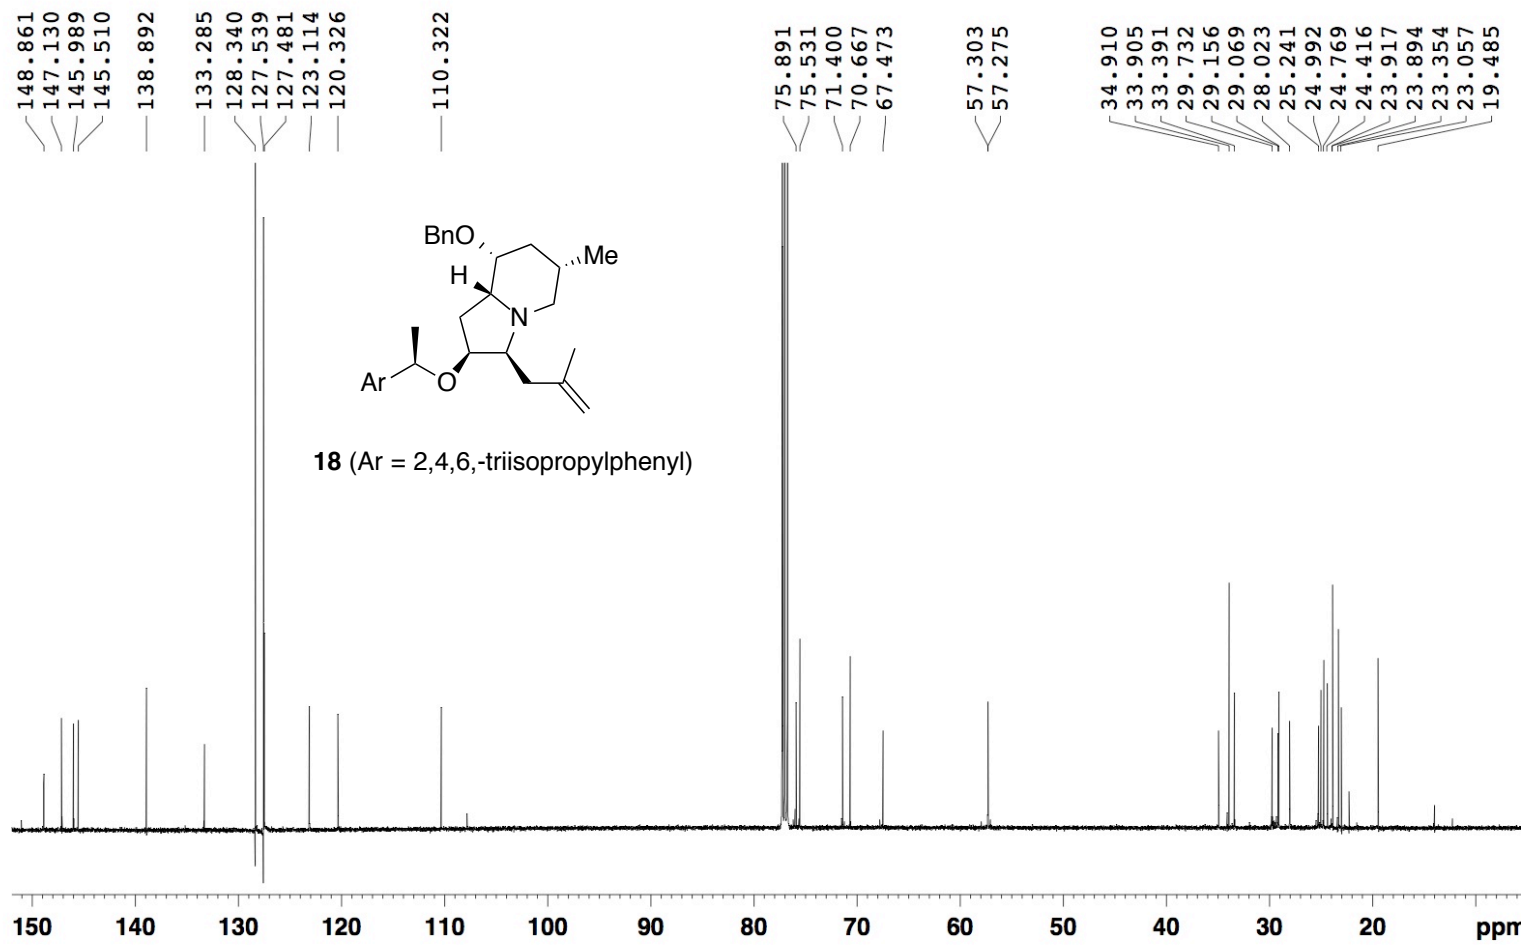

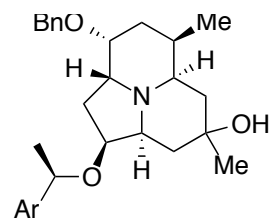

19 (Ar = 2,4,6-triisopropylphenyl)

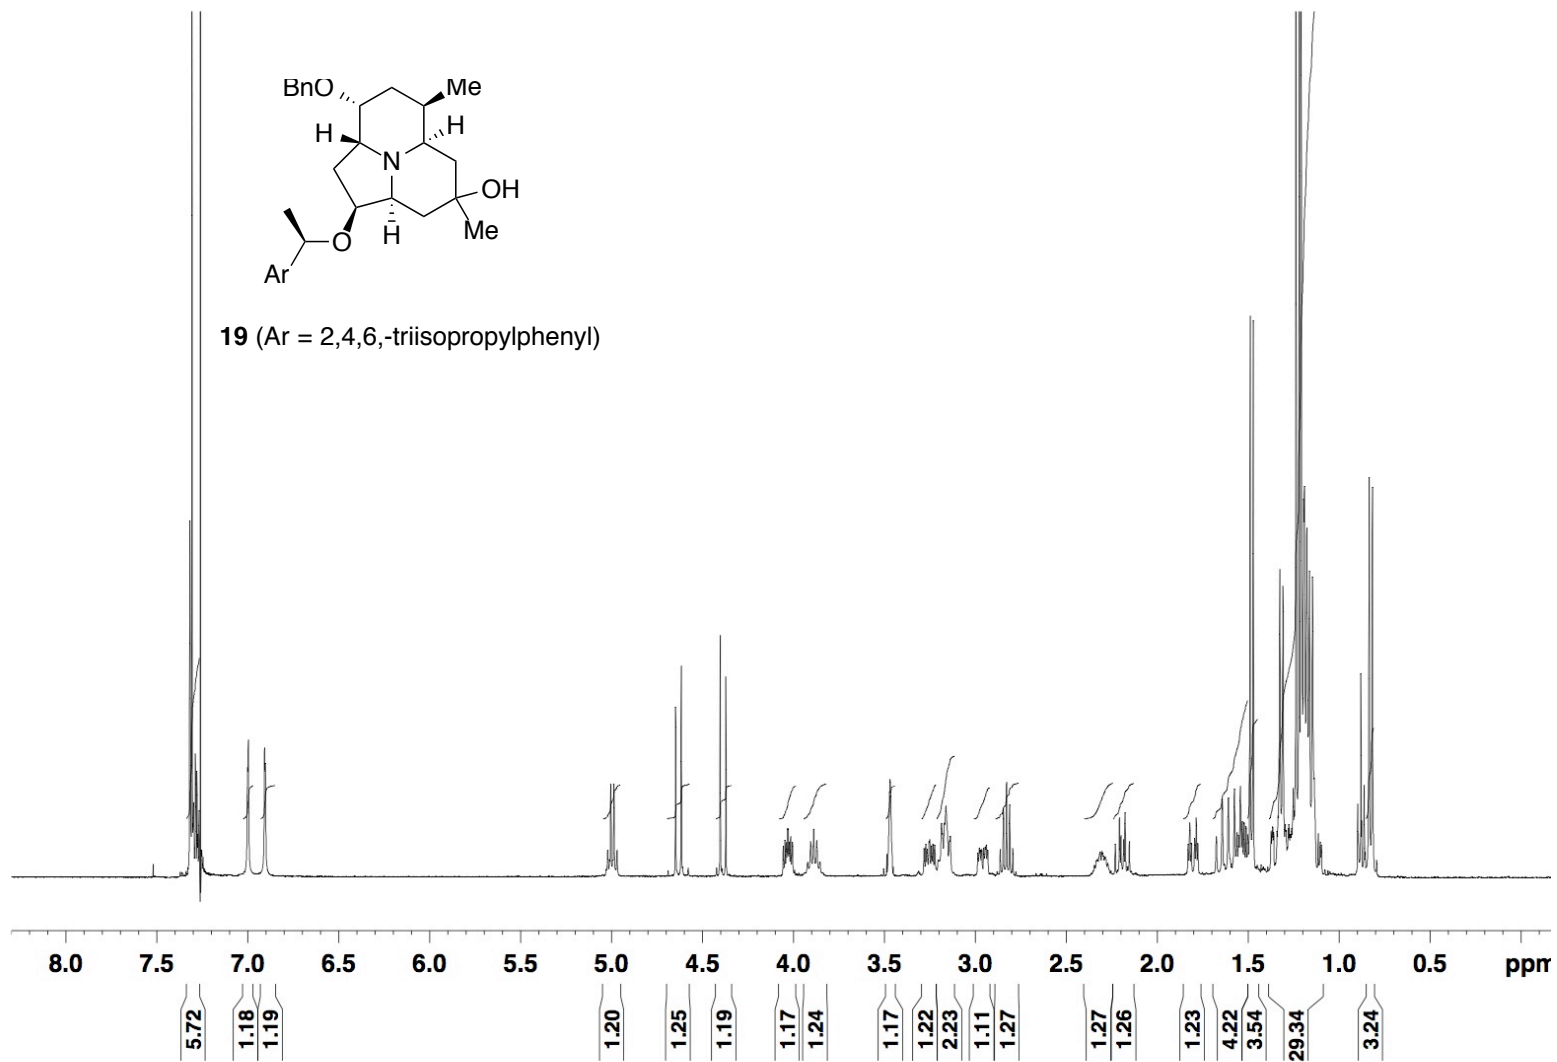



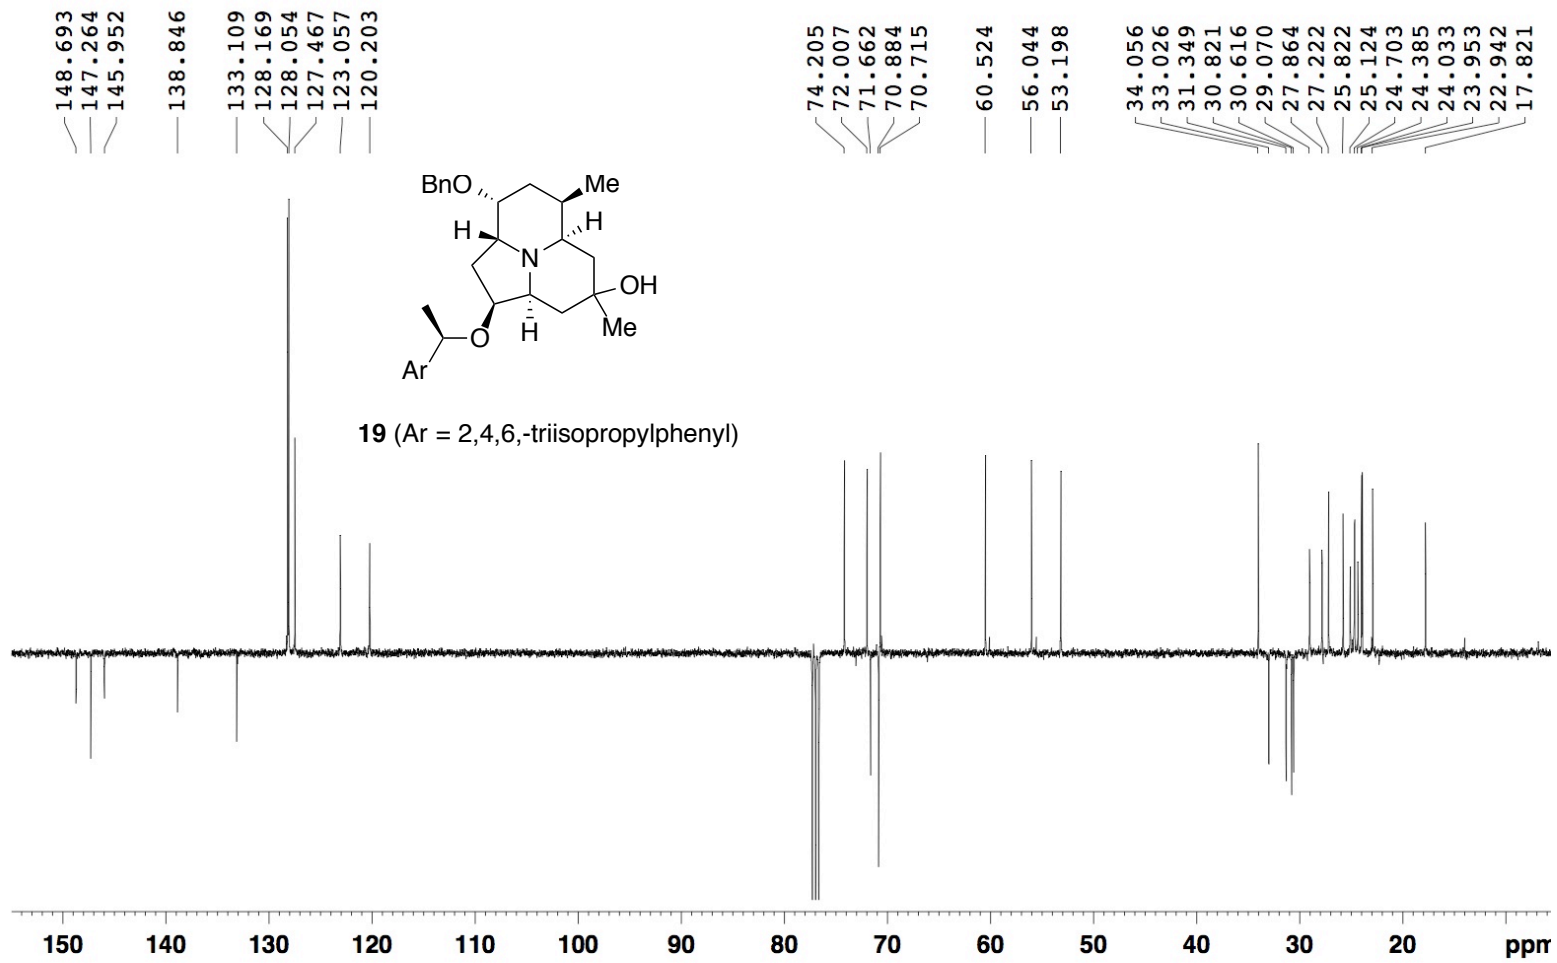

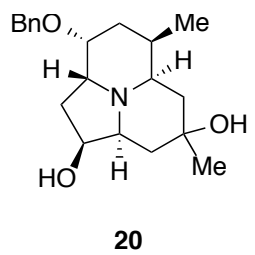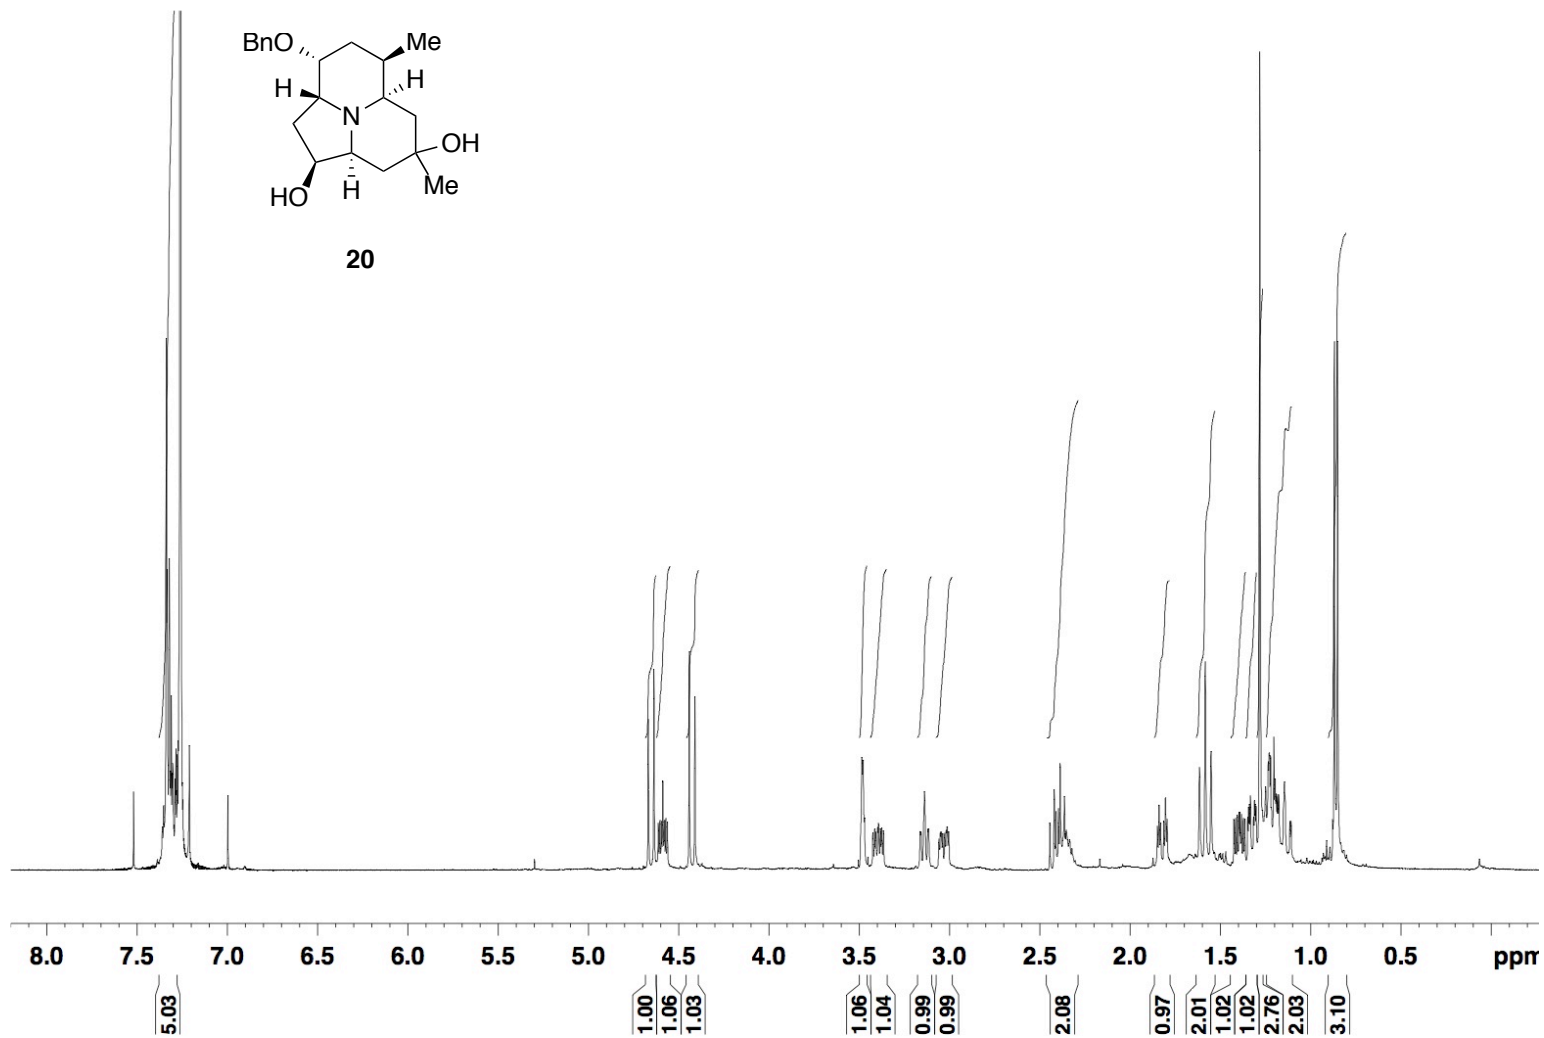

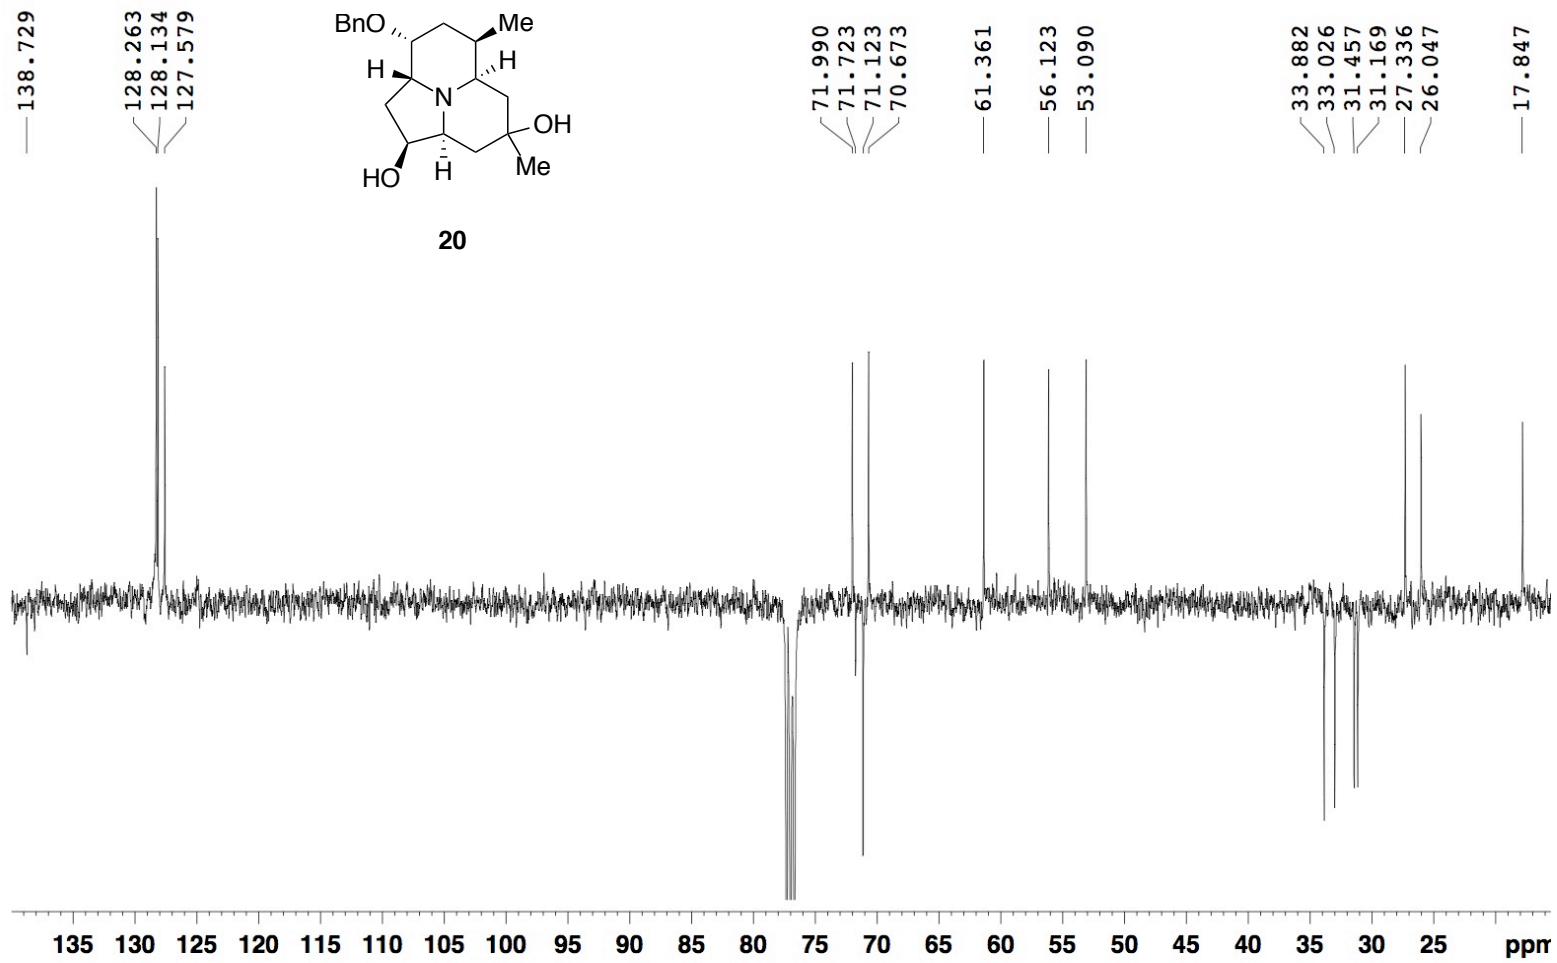

Supplement: c5ob01013f1.pdf [file c5ob01013f1.pdf]
